# Supplementary material
Source: MDPI journal article supplement (https://www.mdpi.com/2311-7524/8/1/59)
Supplement: s1 [file s1]

**A**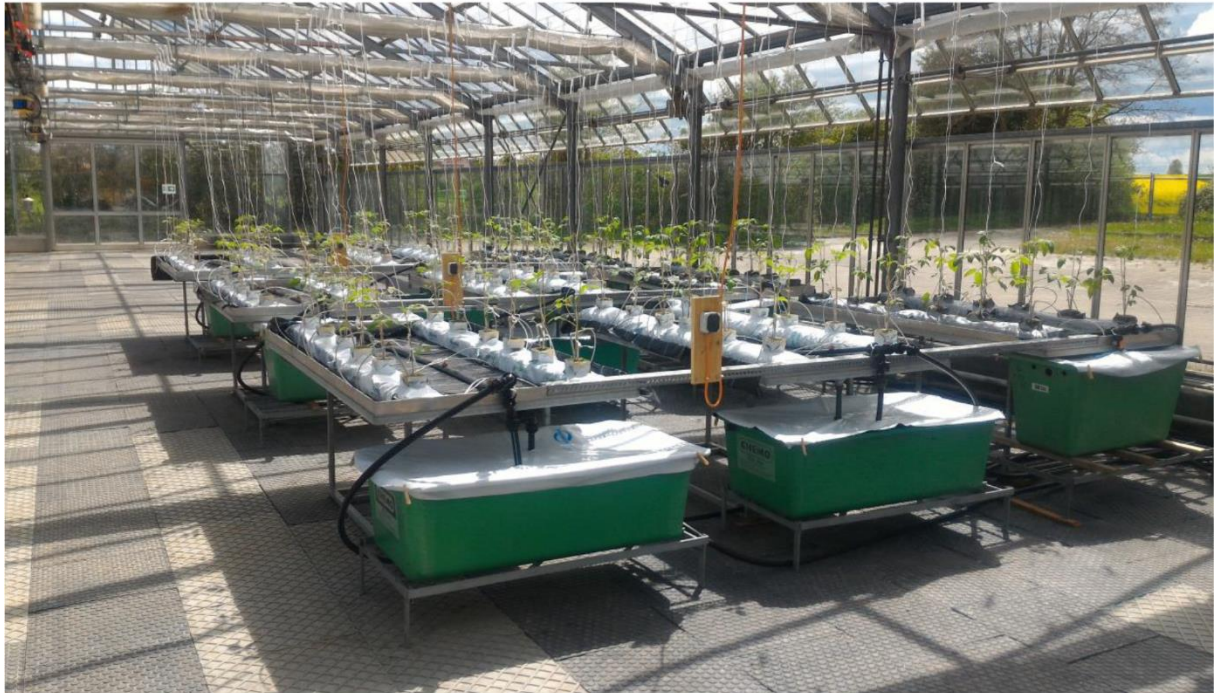**B**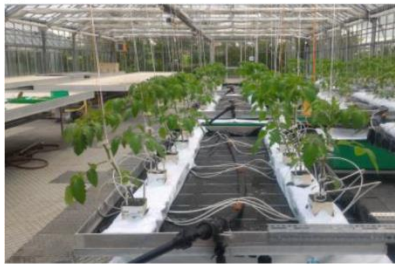**C**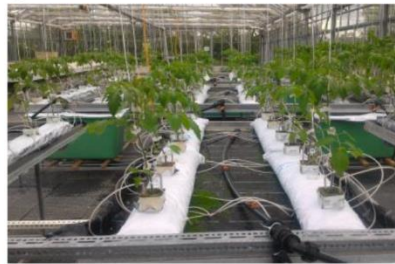**D**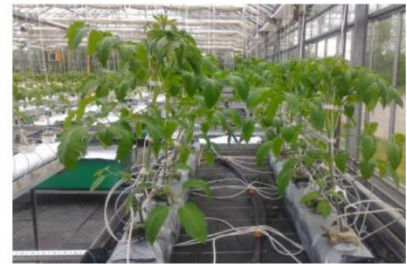

**Supplementary figure S2: Experimental set up in the greenhouse.** (A) Overview of the 9 growing tables, with the different treatments. (B) Growing table with tomato plants being grown in rockwool. (C) Growing table with tomato plants being grown in a perlite substrate. (D) Growing table with tomato plants being grown in coco peat substrate.
