# Supplementary material
Source: MDPI journal article supplement (https://www.mdpi.com/2311-7524/8/1/59)
Supplement: s1 [file s1]

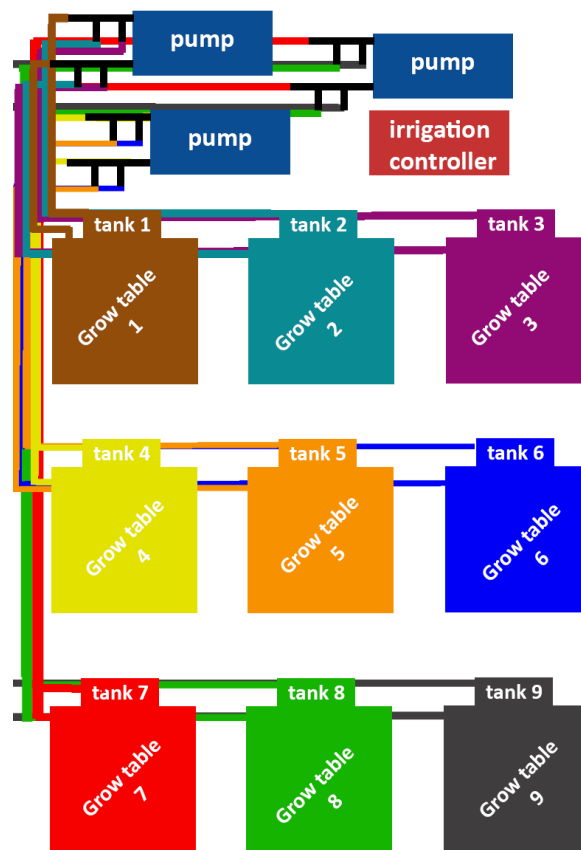

**Supplementary Figure S1: Schematic diagram of the irrigation system.** Different pumps were used for the different salinity levels.
