# Supplementary material
Source: MDPI journal article supplement (https://www.mdpi.com/2311-7524/8/1/59)
Supplement: s1 [file s1]

Archive with 9 entries (9 files):
- Supplementary Figure S1.pdf
- Supplementary Figure S2.pdf
- Supplementary File S1.xlsx
- Supplementary Methods.pdf
- Supplementary Table S1.pdf
- Supplementary Table S2.pdf
- Supplementary Table S3.pdf
- Supplementary Table S4.pdf
- Supplementary Table S5.xlsx
