# Supplementary material
Source: MDPI journal article supplement (https://www.mdpi.com/2311-7524/8/1/59)
Supplement: s1 [file s1 › Supplementary File S1.xlsx]

## Sheet: Raw data for Fig 2
Supplementary File S1: Raw data for Figure 2; fruit weight, average fruit weight, number of fruits, defective fruits.
Harvest	Substrate	Salinity	SampleID	Weight of truss [g]	Weight of fruits [g]	Fruits	Defect fruits	Weight of defect fruis	Defect fruits	Average fruit weight	Sample ID for the replicate	Total number of fruits per replicate	Total weight of fruits per replicate	Defect fruits per replicate	.
				g	g	number	number	g	%	g		number	g	number
2017-08-14	Coco peat	Control	1.1.1	79	72	11	0	0	0	6.54545	1.1	34	339	0
2017-08-14	Coco peat	Control	1.1.2	147	137	11	0	0	0	12.4545
2017-08-14	Coco peat	Control	1.1.3	139	130	12	0	0	0	10.8333
2017-08-14	Coco peat	Control	1.2.1	102	94	13	0	0	0	7.23077	1.2	20	184	0
2017-08-14	Coco peat	Control	1.2.2	55	50	4	0	0	0	12.5
2017-08-14	Coco peat	Control	1.2.3	44	40	3	0	0	0	13.3333
2017-08-14	Coco peat	Control	1.3.1	117	109	9	2	23	18.1818	12.1111	1.3	45	313	7.44949
2017-08-14	Coco peat	Control	1.3.2	117	97	13	0	0	0	7.46154
2017-08-14	Coco peat	Control	1.3.3	220	107	23	1	27	4.16667	4.65217
2017-08-14	Coco peat	Control	1.4.1	73	66	8	0	0	0	8.25	1.4	32	263	0
2017-08-14	Coco peat	Control	1.4.2	104	97	12	0	0	0	8.08333
2017-08-14	Coco peat	Control	1.4.3	106	100	12	0	0	0	8.33333
2017-08-14	Perlite	Control	2.1.1	106	100	13	0	0	0	7.69231	2.1	28	241	0
2017-08-14	Perlite	Control	2.1.2	192	86	12	0	0	0	7.16667
2017-08-14	Perlite	Control	2.1.3	60	55	3	0	0	0	18.3333
2017-08-14	Perlite	Control	2.2.1	89	81	6	2	6	25	13.5	2.2	13	137	8.33333
2017-08-14	Perlite	Control	2.2.2	61	56	7	0	0	0	8
2017-08-14	Perlite	Control	2.2.3						0
2017-08-14	Perlite	Control	2.3.1	118	109	13	0	0	0	8.38462	2.3	40	339	0
2017-08-14	Perlite	Control	2.3.2	100	93	12	0	0	0	7.75
2017-08-14	Perlite	Control	2.3.3	144	137	15	0	0	0	9.13333
2017-08-14	Perlite	Control	2.4.1	94	72	12	2	7	14.2857	6	2.4	12	72	4.7619
2017-08-14	Perlite	Control	2.4.2						0
2017-08-14	Perlite	Control	2.4.3						0
2017-08-14	Rockwool	Control	3.1.1	141	133	10	2	29	16.6667	13.3	3.1	29	246	5.55556
2017-08-14	Rockwool	Control	3.1.2	84	77	12	0	0	0	6.41667
2017-08-14	Rockwool	Control	3.1.3	39	36	7	0	0	0	5.14286
2017-08-14	Rockwool	Control	3.2.1	120	110	12	0	0	0	9.16667	3.2	27	252	4.16667
2017-08-14	Rockwool	Control	3.2.2	164	59	7	1	6	12.5	8.42857
2017-08-14	Rockwool	Control	3.2.3	88	83	8	0	0	0	10.375
2017-08-14	Rockwool	Control	3.3.1	101	95	12	0	0	0	7.91667	3.3	31	269	2.77778
2017-08-14	Rockwool	Control	3.3.2	92	86	11	1	14	8.33333	7.81818
2017-08-14	Rockwool	Control	3.3.3	94	88	8	0	0	0	11
2017-08-14	Rockwool	Control	3.4.1	83	77	7	0	0	0	11	3.4	16	168	4.7619
2017-08-14	Rockwool	Control	3.4.2	27	25	3	0	0	0	8.33333
2017-08-14	Rockwool	Control	3.4.3	71	66	6	1	13	14.2857	11
2017-08-14	Coco peat	17 mM	4.1.1	120	106	12	0	0	0	8.83333	4.1	30	246	0
2017-08-14	Coco peat	17 mM	4.1.2	108	98	11	0	0	0	8.90909
2017-08-14	Coco peat	17 mM	4.1.3	51	42	7	0	0	0	6
2017-08-14	Coco peat	17 mM	4.2.1	69	64	6	0	0	0	10.6667	4.2	29	257	3.7037
2017-08-14	Coco peat	17 mM	4.2.2	69	64	8	1	2	11.1111	8
2017-08-14	Coco peat	17 mM	4.2.3	138	129	15	0	0	0	8.6
2017-08-14	Coco peat	17 mM	4.3.1	119	111	13	0	0	0	8.53846	4.3	38	381	2.5641
2017-08-14	Coco peat	17 mM	4.3.2	140	131	13	0	0	0	10.0769
2017-08-14	Coco peat	17 mM	4.3.3	149	139	12	1	19	7.69231	11.5833
2017-08-14	Coco peat	17 mM	4.4.1	94	88	11	0	0	0	8	4.4	22	191	0
2017-08-14	Coco peat	17 mM	4.4.2						0
2017-08-14	Coco peat	17 mM	4.4.3	110	103	11	0	0	0	9.36364
2017-08-14	Perlite	17 mM	5.1.1	27	22	3	0	0	0	7.33333	5.1	7	42	0
2017-08-14	Perlite	17 mM	5.1.2	33	20	4	0	0	0	5
2017-08-14	Perlite	17 mM	5.1.3						0
2017-08-14	Perlite	17 mM	5.2.1	16	13	3	0	0	0	4.33333	5.2	15	118	3.0303
2017-08-14	Perlite	17 mM	5.2.2	18	15	2	0	0	0	7.5
2017-08-14	Perlite	17 mM	5.2.3	113	90	10	1	13	9.09091	9
2017-08-14	Perlite	17 mM	5.3.1	63	55	8	0	11	0	6.875	5.3	30	237	2.5641
2017-08-14	Perlite	17 mM	5.3.2	74	62	10	0	0	0	6.2
2017-08-14	Perlite	17 mM	5.3.3	129	120	12	1	17	7.69231	10
2017-08-14	Perlite	17 mM	5.4.1	6	4	1	0	0	0	4	5.4	15	162	8.33333
2017-08-14	Perlite	17 mM	5.4.2	82	77	8	0	0	0	9.625
2017-08-14	Perlite	17 mM	5.4.3	58	81	6	2	8	25	13.5
2017-08-14	Rockwool	17 mM	6.1.1	88	81	7	3		30	11.5714	6.1	19	163	10
2017-08-14	Rockwool	17 mM	6.1.2	30	26	3	0	0	0	8.66667
2017-08-14	Rockwool	17 mM	6.1.3	60	56	9	0	0	0	6.22222
2017-08-14	Rockwool	17 mM	6.2.1	50	46	5	0	0	0	9.2	6.2	18	195	0
2017-08-14	Rockwool	17 mM	6.2.2	100	93	10	0	0	0	9.3
2017-08-14	Rockwool	17 mM	6.2.3	50	56	3	0	0	0	18.6667
2017-08-14	Rockwool	17 mM	6.3.1						0		6.3	21	191	0
2017-08-14	Rockwool	17 mM	6.3.2	80	75	9	0	0	0	8.33333
2017-08-14	Rockwool	17 mM	6.3.3	123	116	12	0	0	0	9.66667
2017-08-14	Rockwool	17 mM	6.4.1	51	43	8	1	9	11.1111	5.375	6.4	9	52	3.7037
2017-08-14	Rockwool	17 mM	6.4.2	11	9	1	0	0	0	9
2017-08-14	Rockwool	17 mM	6.4.3						0
2017-08-14	Coco peat	34 mM	7.1.1	146	134	13	0	0	0	10.3077	7.1	28	268	9.44444
2017-08-14	Coco peat	34 mM	7.1.2	122	114	11	1	13	8.33333	10.3636
2017-08-14	Coco peat	34 mM	7.1.3	25	20	4	1	12	20	5
2017-08-14	Coco peat	34 mM	7.2.1	108	102	13	0	0	0	7.84615	7.2	32	224	0
2017-08-14	Coco peat	34 mM	7.2.2	129	119	17	0	0	0	7
2017-08-14	Coco peat	34 mM	7.2.3	11	3	2	0	0	0	1.5
2017-08-14	Coco peat	34 mM	7.3.1	80	73	11	1	11	8.33333	6.63636	7.3	38	260	2.77778
2017-08-14	Coco peat	34 mM	7.3.2	118	108	15	0	0	0	7.2
2017-08-14	Coco peat	34 mM	7.3.3	88	79	12	0	0	0	6.58333
2017-08-14	Coco peat	34 mM	7.4.1	106	98	11	0	0	0	8.90909	7.4	26	205	0
2017-08-14	Coco peat	34 mM	7.4.2	32	29	4	0	0	0	7.25
2017-08-14	Coco peat	34 mM	7.4.3	84	78	11	0	0	0	7.09091
2017-08-14	Perlite	34 mM	8.1.1	34	37	4	2	9	33.3333	9.25	8.1	18	152	11.1111
2017-08-14	Perlite	34 mM	8.1.2	19	15	2	0	0	0	7.5
2017-08-14	Perlite	34 mM	8.1.3	109	100	12	0	0	0	8.33333
2017-08-14	Perlite	34 mM	8.2.1	36	27	3	0	0	0	9	8.2	25	178	0
2017-08-14	Perlite	34 mM	8.2.2	93	85	10	0	0	0	8.5
2017-08-14	Perlite	34 mM	8.2.3	72	66	12	0	0	0	5.5
2017-08-14	Perlite	34 mM	8.3.1	70	63	7	0	0	0	9	8.3	18	186	0
2017-08-14	Perlite	34 mM	8.3.2	46	40	4	0	0	0	10
2017-08-14	Perlite	34 mM	8.3.3	95	83	7	0	0	0	11.8571
2017-08-14	Perlite	34 mM	8.4.1						0		8.4	2	9	0
2017-08-14	Perlite	34 mM	8.4.2						0
2017-08-14	Perlite	34 mM	8.4.3	10	9	2	0	0	0	4.5
2017-08-14	Rockwool	34 mM	9.1.1	159	146	12	0	0	0	12.1667	9.1	35	368	0
2017-08-14	Rockwool	34 mM	9.1.2	119	109	10	0	0	0	10.9
2017-08-14	Rockwool	34 mM	9.1.3	117	113	13	0	0	0	8.69231
2017-08-14	Rockwool	34 mM	9.2.1	76	68	8	0	0	0	8.5	9.2	8	68	0
2017-08-14	Rockwool	34 mM	9.2.2						0
2017-08-14	Rockwool	34 mM	9.2.3						0
2017-08-14	Rockwool	34 mM	9.3.1	34	26	5	2	11	28.5714	5.2	9.3	28	181	9.52381
2017-08-14	Rockwool	34 mM	9.3.2	78	71	11	0	0	0	6.45455
2017-08-14	Rockwool	34 mM	9.3.3	90	84	12	0	0	0	7
2017-08-14	Rockwool	34 mM	9.4.1						0		9.4	10	68	0
2017-08-14	Rockwool	34 mM	9.4.2						0
2017-08-14	Rockwool	34 mM	9.4.3	75	68	10	0	0	0	6.8
2017-08-28	Coco peat	Control	1.1.1	109	102	9	0	0	0	11.3333	1.1	29	297	0
2017-08-28	Coco peat	Control	1.1.2	95	87	10	0	0	0	8.7
2017-08-28	Coco peat	Control	1.1.3	117	108	10	0	0	0	10.8
2017-08-28	Coco peat	Control	1.2.1	122	113	8	0	0	0	14.125	1.2	31	358	0
2017-08-28	Coco peat	Control	1.2.2	138	130	12	0	0	0	10.8333
2017-08-28	Coco peat	Control	1.2.3	123	115	11	0	0	0	10.4545
2017-08-28	Coco peat	Control	1.3.1	152	143	11	0	0	0	13	1.3	34	439	0
2017-08-28	Coco peat	Control	1.3.2	170	163	12	0	0	0	13.5833
2017-08-28	Coco peat	Control	1.3.3	142	133	11	0	0	0	12.0909
2017-08-28	Coco peat	Control	1.4.1	98	88	10	0	0	0	8.8	1.4	30	371	0
2017-08-28	Coco peat	Control	1.4.2	135	125	11	0	0	0	11.3636
2017-08-28	Coco peat	Control	1.4.3	169	158	9	0	0	0	17.5556
2017-08-28	Perlite	Control	2.1.1	92	85	11	0	0	0	7.72727	2.1	32	218	0
2017-08-28	Perlite	Control	2.1.2	58	52	9	0	0	0	5.77778
2017-08-28	Perlite	Control	2.1.3	87	81	12	0	0	0	6.75
2017-08-28	Perlite	Control	2.2.1	97	92	9	0	0	0	10.2222	2.2	28	278	0
2017-08-28	Perlite	Control	2.2.2	114	107	10	0	0	0	10.7
2017-08-28	Perlite	Control	2.2.3	85	79	9	0	0	0	8.77778
2017-08-28	Perlite	Control	2.3.1	34	23	7	0	0	0	3.28571	2.3	25	151	0
2017-08-28	Perlite	Control	2.3.2	63	56	9	0	0	0	6.22222
2017-08-28	Perlite	Control	2.3.3	83	72	9	0	0	0	8
2017-08-28	Perlite	Control	2.4.1				0	0	0		2.4	19	173	0
2017-08-28	Perlite	Control	2.4.2	44	41	8	0	0	0	5.125
2017-08-28	Perlite	Control	2.4.3	140	132	11	0	0	0	12
2017-08-28	Rockwool	Control	3.1.1	159	148	10	0	0	0	14.8	3.1	32	420	0
2017-08-28	Rockwool	Control	3.1.2	159	149	11	0	0	0	13.5455
2017-08-28	Rockwool	Control	3.1.3	133	123	11	0	0	0	11.1818
2017-08-28	Rockwool	Control	3.2.1	36	33	7	0	0	0	4.71429	3.2	29	231	0
2017-08-28	Rockwool	Control	3.2.2	138	129	12	0	0	0	10.75
2017-08-28	Rockwool	Control	3.2.3	76	69	10	0	0	0	6.9
2017-08-28	Rockwool	Control	3.3.1	12	4	2	0	0	0	2	3.3	23	190	0
2017-08-28	Rockwool	Control	3.3.2	120	114	11	0	0	0	10.3636
2017-08-28	Rockwool	Control	3.3.3	82	72	10	0	0	0	7.2
2017-08-28	Rockwool	Control	3.4.1	92	84	6	0	0	0	14	3.4	26	250	0
2017-08-28	Rockwool	Control	3.4.2	121	113	12	0	0	0	9.41667
2017-08-28	Rockwool	Control	3.4.3	57	53	8	0	0	0	6.625
2017-08-28	Coco peat	17 mM	4.1.1	128	116	9	0	0	0	12.8889	4.1	30	319	0
2017-08-28	Coco peat	17 mM	4.1.2	123	116	11	0	0	0	10.5455
2017-08-28	Coco peat	17 mM	4.1.3	104	87	10	0	0	0	8.7
2017-08-28	Coco peat	17 mM	4.2.1	143	135	12	0	0	0	11.25	4.2	31	249	0
2017-08-28	Coco peat	17 mM	4.2.2	91	84	12	0	0	0	7
2017-08-28	Coco peat	17 mM	4.2.3	33	30	7	0	0	0	4.28571
2017-08-28	Coco peat	17 mM	4.3.1	126	117	10	0	0	0	11.7	4.3	40	391	0
2017-08-28	Coco peat	17 mM	4.3.2	236	221	20	0	0	0	11.05
2017-08-28	Coco peat	17 mM	4.3.3	58	53	10	0	0	0	5.3
2017-08-28	Coco peat	17 mM	4.4.1	145	137	10	0	0	0	13.7	4.4	32	395	0
2017-08-28	Coco peat	17 mM	4.4.2	126	117	12	0	0	0	9.75
2017-08-28	Coco peat	17 mM	4.4.3	150	141	10	0	0	0	14.1
2017-08-28	Perlite	17 mM	5.1.1	105	98	10	0	0	0	9.8	5.1	141	293	0
2017-08-28	Perlite	17 mM	5.1.2	125	115	122	0	0	0	0.942623
2017-08-28	Perlite	17 mM	5.1.3	85	80	9	0	0	0	8.88889
2017-08-28	Perlite	17 mM	5.2.1						0		5.2	10	115	0
2017-08-28	Perlite	17 mM	5.2.2						0
2017-08-28	Perlite	17 mM	5.2.3	122	115	10	0	0	0	11.5
2017-08-28	Perlite	17 mM	5.3.1	182	173	11	0	0	0	15.7273	5.3	25	364	0
2017-08-28	Perlite	17 mM	5.3.2	57	53	4	0	0	0	13.25
2017-08-28	Perlite	17 mM	5.3.3	147	138	10	0	0	0	13.8
2017-08-28	Perlite	17 mM	5.4.1	102	97	8	2	16	20	12.125	5.4	20	234	6.66667
2017-08-28	Perlite	17 mM	5.4.2	122	115	10	0	0	0	11.5
2017-08-28	Perlite	17 mM	5.4.3	27	22	2	0	0	0	11
2017-08-28	Rockwool	17 mM	6.1.1	42	35	6	0	0	0	5.83333	6.1	28	232	0
2017-08-28	Rockwool	17 mM	6.1.2	134	124	14	0	0	0	8.85714
2017-08-28	Rockwool	17 mM	6.1.3	79	73	8	0	0	0	9.125
2017-08-28	Rockwool	17 mM	6.2.1	63	57	11	0	0	0	5.18182	6.2	18	117	6.66667
2017-08-28	Rockwool	17 mM	6.2.2	35	27	4	1	0	20	6.75
2017-08-28	Rockwool	17 mM	6.2.3	40	33	3	0	0	0	11
2017-08-28	Rockwool	17 mM	6.3.1	87	80	10	0	0	0	8	6.3	32	224	0
2017-08-28	Rockwool	17 mM	6.3.2	79	73	10	0	0	0	7.3
2017-08-28	Rockwool	17 mM	6.3.3	79	71	12	0	0	0	5.91667
2017-08-28	Rockwool	17 mM	6.4.1						0		6.4	5	26	0
2017-08-28	Rockwool	17 mM	6.4.2	23	17	2	0	0	0	8.5
2017-08-28	Rockwool	17 mM	6.4.3	13	9	3	0	0	0	3
2017-08-28	Coco peat	34 mM	7.1.1	57	52	9	0	0	0	5.77778	7.1	31	188	0
2017-08-28	Coco peat	34 mM	7.1.2	59	41	12	0	0	0	3.41667
2017-08-28	Coco peat	34 mM	7.1.3	101	95	10	0	0	0	9.5
2017-08-28	Coco peat	34 mM	7.2.1	127	119	9	0	0	0	13.2222	7.2	31	256	0
2017-08-28	Coco peat	34 mM	7.2.2	54	48	10	0	0	0	4.8
2017-08-28	Coco peat	34 mM	7.2.3	95	89	12	0	0	0	7.41667
2017-08-28	Coco peat	34 mM	7.3.1	58	52	10	0	0	0	5.2	7.3	31	234	3.33333
2017-08-28	Coco peat	34 mM	7.3.2	90	83	9	1	12	10	9.22222
2017-08-28	Coco peat	34 mM	7.3.3	110	99	12	0	0	0	8.25
2017-08-28	Coco peat	34 mM	7.4.1	60	56	10	1	6	9.09091	5.6	7.4	32	171	6.06061
2017-08-28	Coco peat	34 mM	7.4.2	64	58	10	1	12	9.09091	5.8
2017-08-28	Coco peat	34 mM	7.4.3	64	57	12	0	0	0	4.75
2017-08-28	Perlite	34 mM	8.1.1	69	64	8	0	0	0	8	8.1	31	165	0
2017-08-28	Perlite	34 mM	8.1.2	47	42	11	0	0	0	3.81818
2017-08-28	Perlite	34 mM	8.1.3	66	59	12	0	0	0	4.91667
2017-08-28	Perlite	34 mM	8.2.1						0		8.2	21	126	3.0303
2017-08-28	Perlite	34 mM	8.2.2	62	56	10	1	6	9.09091	5.6
2017-08-28	Perlite	34 mM	8.2.3	74	70	11	0	0	0	6.36364
2017-08-28	Perlite	34 mM	8.3.1	42795	95	11	0	0	0	8.63636	8.3	25	293	0
2017-08-28	Perlite	34 mM	8.3.2	149	141	10	0	0	0	14.1
2017-08-28	Perlite	34 mM	8.3.3	60	57	4	0	0	0	14.25
2017-08-28	Perlite	34 mM	8.4.1	88	82	11	0	0	0	7.45455	8.4	16	103	0
2017-08-28	Perlite	34 mM	8.4.2						0
2017-08-28	Perlite	34 mM	8.4.3	24	21	5	0	0	0	4.2
2017-08-28	Rockwool	34 mM	9.1.1	86	78	13	0	0	0	6	9.1	23	153	0
2017-08-28	Rockwool	34 mM	9.1.2	18	12	3	0	0	0	4
2017-08-28	Rockwool	34 mM	9.1.3	72	63	7	0	0	0	9
2017-08-28	Rockwool	34 mM	9.2.1	20	15	3	0	0	0	5	9.2	8	39	0
2017-08-28	Rockwool	34 mM	9.2.2	30	24	5	0	0	0	4.8
2017-08-28	Rockwool	34 mM	9.2.3						0
2017-08-28	Rockwool	34 mM	9.3.1	57	49	11	0	0	0	4.45455	9.3	20	133	0
2017-08-28	Rockwool	34 mM	9.3.2	89	84	9	0	0	0	9.33333
2017-08-28	Rockwool	34 mM	9.3.3						0
2017-08-28	Rockwool	34 mM	9.4.1	72	61	10	0	0	0	6.1	9.4	19	143	5.55556
2017-08-28	Rockwool	34 mM	9.4.2	26	23	5	1	8	16.6667	4.6
2017-08-28	Rockwool	34 mM	9.4.3	61	59	4	0	0	0	14.75
2017-09-04	Coco peat	Control	1.1.1	112	105	10	0	0	0	10.5	1.1	30	359	0
2017-09-04	Coco peat	Control	1.1.2	117	107	10	0	0	0	10.7
2017-09-04	Coco peat	Control	1.1.3	156	147	10	0	0	0	14.7
2017-09-04	Coco peat	Control	1.2.1	145	136	11	0	0	0	12.3636	1.2	31	448	0
2017-09-04	Coco peat	Control	1.2.2	141	137	10	0	0	0	13.7
2017-09-04	Coco peat	Control	1.2.3	185	175	10	0	0	0	17.5
2017-09-04	Coco peat	Control	1.3.1	225	213	15	0	0	0	14.2	1.3	39	522	0
2017-09-04	Coco peat	Control	1.3.2	173	163	12	0	0	0	13.5833
2017-09-04	Coco peat	Control	1.3.3	157	146	12	0	0	0	12.1667
2017-09-04	Coco peat	Control	1.4.1	122	113	9	0	0	0	12.5556	1.4	29	428	0
2017-09-04	Coco peat	Control	1.4.2	185	175	9	0	0	0	19.4444
2017-09-04	Coco peat	Control	1.4.3	150	140	11	0	0	0	12.7273
2017-09-04	Perlite	Control	2.1.1	92	86	11	0	0	0	7.81818	2.1	29	219	0
2017-09-04	Perlite	Control	2.1.2	60	56	9	0	0	0	6.22222
2017-09-04	Perlite	Control	2.1.3	87	77	9	0	0	0	8.55556
2017-09-04	Perlite	Control	2.2.1	98	91	9	0	0	0	10.1111	2.2	19	165	0
2017-09-04	Perlite	Control	2.2.2	22	18	2	0	0	0	9
2017-09-04	Perlite	Control	2.2.3	63	56	8	0	0	0	7
2017-09-04	Perlite	Control	2.3.1	22	19	2	0	0	0	9.5	2.3	20	172	4.7619
2017-09-04	Perlite	Control	2.3.2	110	102	12	0	0	0	8.5
2017-09-04	Perlite	Control	2.3.3	66	51	6	1	10	14.2857	8.5
2017-09-04	Perlite	Control	2.4.1						0		2.4	14	125	0
2017-09-04	Perlite	Control	2.4.2	52	46	7	0	0	0	6.57143
2017-09-04	Perlite	Control	2.4.3	87	79	7	0	0	0	11.2857
2017-09-04	Rockwool	Control	3.1.1	161	152	9	0	0	0	16.8889	3.1	31	396	0
2017-09-04	Rockwool	Control	3.1.2	179	170	10	0	0	0	17
2017-09-04	Rockwool	Control	3.1.3	83	74	12	0	0	0	6.16667
2017-09-04	Rockwool	Control	3.2.1	97	91	10	0	0	0	9.1	3.2	31	262	0
2017-09-04	Rockwool	Control	3.2.2	74	60	9	0	0	0	6.66667
2017-09-04	Rockwool	Control	3.2.3	120	111	12	0	0	0	9.25
2017-09-04	Rockwool	Control	3.3.1	129	101	10	1	20	9.09091	10.1	3.3	32	302	3.0303
2017-09-04	Rockwool	Control	3.3.2	110	101	11	0	0	0	9.18182
2017-09-04	Rockwool	Control	3.3.3	107	100	11	0	0	0	9.09091
2017-09-04	Rockwool	Control	3.4.1	127	109	9	1	11	10	12.1111	3.4	26	282	8.88889
2017-09-04	Rockwool	Control	3.4.2	104	97	12	0	0	0	8.08333
2017-09-04	Rockwool	Control	3.4.3	95	76	5	1	10	16.6667	15.2
2017-09-04	Coco peat	17 mM	4.1.1	184	174	12	0	0	0	14.5	4.1	32	410	0
2017-09-04	Coco peat	17 mM	4.1.2	134	123	11	0	0	0	11.1818
2017-09-04	Coco peat	17 mM	4.1.3	121	113	9	0	0	0	12.5556
2017-09-04	Coco peat	17 mM	4.2.1	117	109	10	0	0	0	10.9	4.2	32	344	0
2017-09-04	Coco peat	17 mM	4.2.2	98	91	12	0	0	0	7.58333
2017-09-04	Coco peat	17 mM	4.2.3	154	144	10	0	0	0	14.4
2017-09-04	Coco peat	17 mM	4.3.1	139	131	9	0	0	0	14.5556	4.3	28	357	3.33333
2017-09-04	Coco peat	17 mM	4.3.2	113	93	9	1	10	10	10.3333
2017-09-04	Coco peat	17 mM	4.3.3	141	133	10	0	0	0	13.3
2017-09-04	Coco peat	17 mM	4.4.1	200	190	12	0	0	0	15.8333	4.4	32	447	3.0303
2017-09-04	Coco peat	17 mM	4.4.2	135	121	10	1	4	9.09091	12.1
2017-09-04	Coco peat	17 mM	4.4.3	145	136	10	0	0	0	13.6
2017-09-04	Perlite	17 mM	5.1.1	132	123	11	0	0	0	11.1818	5.1	35	382	0
2017-09-04	Perlite	17 mM	5.1.2	138	130	11	0	0	0	11.8182
2017-09-04	Perlite	17 mM	5.1.3	138	129	13	0	0	0	9.92308
2017-09-04	Perlite	17 mM	5.2.1	49	45	7	0	0	0	6.42857	5.2	29	266	0
2017-09-04	Perlite	17 mM	5.2.2	117	109	11	0	0	0	9.90909
2017-09-04	Perlite	17 mM	5.2.3	122	112	11	0	0	0	10.1818
2017-09-04	Perlite	17 mM	5.3.1	130	124	9	0	0	0	13.7778	5.3	30	392	0
2017-09-04	Perlite	17 mM	5.3.2	118	110	9	0	0	0	12.2222
2017-09-04	Perlite	17 mM	5.3.3	165	158	12	0	0	0	13.1667
2017-09-04	Perlite	17 mM	5.4.1	85	79	7	0	0	0	11.2857	5.4	19	227	16.6667
2017-09-04	Perlite	17 mM	5.4.2	45	31	3	2	7	40	10.3333
2017-09-04	Perlite	17 mM	5.4.3	129	117	9	1	5	10	13
2017-09-04	Rockwool	17 mM	6.1.1	54	47	6	4	25	40	7.83333	6.1	27	282	13.3333
2017-09-04	Rockwool	17 mM	6.1.2	75	67	9	0	0	0	7.44444
2017-09-04	Rockwool	17 mM	6.1.3	167	168	12	0	0	0	14
2017-09-04	Rockwool	17 mM	6.2.1	126	117	12	0	0	0	9.75	6.2	28	299	3.0303
2017-09-04	Rockwool	17 mM	6.2.2	70	66	6	0	0	0	11
2017-09-04	Rockwool	17 mM	6.2.3	124	116	10	1	12	9.09091	11.6
2017-09-04	Rockwool	17 mM	6.3.1	103	95	8	1	5	11.1111	11.875	6.3	31	339	6.26781
2017-09-04	Rockwool	17 mM	6.3.2	122	114	11	0	0	0	10.3636
2017-09-04	Rockwool	17 mM	6.3.3	142	130	12	1	4	7.69231	10.8333
2017-09-04	Rockwool	17 mM	6.4.1	100	93	8	2	18	20	11.625	6.4	19	200	14.0741
2017-09-04	Rockwool	17 mM	6.4.2	74	55	7	2	15	22.2222	7.85714
2017-09-04	Rockwool	17 mM	6.4.3	57	52	4	0	0	0	13
2017-09-04	Coco peat	34 mM	7.1.1	71	65	10	0	0	0	6.5	7.1	32	283	0
2017-09-04	Coco peat	34 mM	7.1.2	96	89	12	0	0	0	7.41667
2017-09-04	Coco peat	34 mM	7.1.3	137	129	10	0	0	0	12.9
2017-09-04	Coco peat	34 mM	7.2.1	132	122	10	0	0	0	12.2	7.2	28	326	3.33333
2017-09-04	Coco peat	34 mM	7.2.2	132	124	9	0	0	0	13.7778
2017-09-04	Coco peat	34 mM	7.2.3	88	80	9	1	14	10	8.88889
2017-09-04	Coco peat	34 mM	7.3.1	107	99	10	0	0	0	9.9	7.3	31	280	0
2017-09-04	Coco peat	34 mM	7.3.2	89	84	10	0	0	0	8.4
2017-09-04	Coco peat	34 mM	7.3.3	105	97	11	0	0	0	8.81818
2017-09-04	Coco peat	34 mM	7.4.1	97	91	10	1	8	9.09091	9.1	7.4	28	214	3.0303
2017-09-04	Coco peat	34 mM	7.4.2	39	35	7	0	0	0	5
2017-09-04	Coco peat	34 mM	7.4.3	93	88	11	0	0	0	8
2017-09-04	Perlite	34 mM	8.1.1	83	76	8	0	0	0	9.5	8.1	18	185	0
2017-09-04	Perlite	34 mM	8.1.2	116	109	10	0	0	0	10.9
2017-09-04	Perlite	34 mM	8.1.3						0
2017-09-04	Perlite	34 mM	8.2.1	90	84	10	1	7	9.09091	8.4	8.2	10	84	3.0303
2017-09-04	Perlite	34 mM	8.2.2						0
2017-09-04	Perlite	34 mM	8.2.3						0
2017-09-04	Perlite	34 mM	8.3.1	64	60	8	0	0	0	7.5	8.3	23	208	0
2017-09-04	Perlite	34 mM	8.3.2	125	117	9	0	0	0	13
2017-09-04	Perlite	34 mM	8.3.3	41	31	6	0	0	0	5.16667
2017-09-04	Perlite	34 mM	8.4.1						0		8.4	4	39	0
2017-09-04	Perlite	34 mM	8.4.2						0
2017-09-04	Perlite	34 mM	8.4.3	54	39	4	0	0	0	9.75
2017-09-04	Rockwool	34 mM	9.1.1	22	15	3	0	0	0	5	9.1	16	140	0
2017-09-04	Rockwool	34 mM	9.1.2	136	125	13	0	0	0	9.61538
2017-09-04	Rockwool	34 mM	9.1.3						0
2017-09-04	Rockwool	34 mM	9.2.1	52	46	5	0	0	0	9.2	9.2	21	180	0
2017-09-04	Rockwool	34 mM	9.2.2	85	79	9	0	0	0	8.77778
2017-09-04	Rockwool	34 mM	9.2.3	59	55	7	0	0	0	7.85714
2017-09-04	Rockwool	34 mM	9.3.1	67	63	5	0	0	0	12.6	9.3	15	131	4.7619
2017-09-04	Rockwool	34 mM	9.3.2	50	43	6	1	15	14.2857	7.16667
2017-09-04	Rockwool	34 mM	9.3.3	27	25	4	0	0	0	6.25
2017-09-04	Rockwool	34 mM	9.4.1	57	52	6	0	0	0	8.66667	9.4	17	151	0
2017-09-04	Rockwool	34 mM	9.4.2	49	46	4	0	0	0	11.5
2017-09-04	Rockwool	34 mM	9.4.3	58	53	7	0	0	0	7.57143
2017-09-11	Coco peat	Control	1.1.1	122	113	12	0	0	0	9.41667	1.1	34	389	2.5641
2017-09-11	Coco peat	Control	1.1.2	186	169	12	1	11	7.69231	14.0833
2017-09-11	Coco peat	Control	1.1.3	114	107	10	0	0	0	10.7
2017-09-11	Coco peat	Control	1.2.1	134	124	10	0	0	0	12.4	1.2	31	386	0
2017-09-11	Coco peat	Control	1.2.2	82	75	10	0	0	0	7.5
2017-09-11	Coco peat	Control	1.2.3	195	187	11	0	0	0	17
2017-09-11	Coco peat	Control	1.3.1	179	169	14	0	0	0	12.0714	1.3	32	441	6.66667
2017-09-11	Coco peat	Control	1.3.2	99	91	10	0	0	0	9.1
2017-09-11	Coco peat	Control	1.3.3	223	181	8	2	30	20	22.625
2017-09-11	Coco peat	Control	1.4.1	152	141	12	0	0	0	11.75	1.4	31	359	0
2017-09-11	Coco peat	Control	1.4.2	103	97	7	0	0	0	13.8571
2017-09-11	Coco peat	Control	1.4.3	130	121	12	0	0	0	10.0833
2017-09-11	Perlite	Control	2.1.1	90	76	8	1	8	11.1111	9.5	2.1	28	294	3.7037
2017-09-11	Perlite	Control	2.1.2	121	114	10	0	0	0	11.4
2017-09-11	Perlite	Control	2.1.3	113	104	10	0	0	0	10.4
2017-09-11	Perlite	Control	2.2.1	85	76	6	0	0	0	12.6667	2.2	9	117	0
2017-09-11	Perlite	Control	2.2.2	43	41	3	0	0	0	13.6667
2017-09-11	Perlite	Control	2.2.3						0
2017-09-11	Perlite	Control	2.3.1	129	120	9	1	5	10	13.3333	2.3	31	407	3.33333
2017-09-11	Perlite	Control	2.3.2	164	155	10	0	0	0	15.5
2017-09-11	Perlite	Control	2.3.3	139	132	12	0	0	0	11
2017-09-11	Perlite	Control	2.4.1						0		2.4	19	253	3.33333
2017-09-11	Perlite	Control	2.4.2	195	164	9	1	1	10	18.2222
2017-09-11	Perlite	Control	2.4.3	98	89	10	0	0	0	8.9
2017-09-11	Rockwool	Control	3.1.1	126	105	9	1	12	10	11.6667	3.1	31	374	3.33333
2017-09-11	Rockwool	Control	3.1.2	117	108	10	0	0	0	10.8
2017-09-11	Rockwool	Control	3.1.3	171	161	12	0	0	0	13.4167
2017-09-11	Rockwool	Control	3.2.1	145	134	9	0	0	0	14.8889	3.2	28	428	8.33333
2017-09-11	Rockwool	Control	3.2.2	140	131	10	0	0	0	13.1
2017-09-11	Rockwool	Control	3.2.3	214	163	9	3	39	25	18.1111
2017-09-11	Rockwool	Control	3.3.1	149	107	7	2	31	22.2222	15.2857	3.3	22	301	14.0741
2017-09-11	Rockwool	Control	3.3.2	143	99	8	2	37	20	12.375
2017-09-11	Rockwool	Control	3.3.3	102	95	7	0	0	0	13.5714
2017-09-11	Rockwool	Control	3.4.1	159	117	11	2	26	15.3846	10.6364	3.4	31	407	9.29487
2017-09-11	Rockwool	Control	3.4.2	196	186	13	0	0	0	14.3077
2017-09-11	Rockwool	Control	3.4.3	127	104	7	1	15	12.5	14.8571
2017-09-11	Coco peat	17 mM	4.1.1	160	135	9	2	17	18.1818	15	4.1	31	423	6.06061
2017-09-11	Coco peat	17 mM	4.1.2	170	160	11	0	0	0	14.5455
2017-09-11	Coco peat	17 mM	4.1.3	137	128	11	0	0	0	11.6364
2017-09-11	Coco peat	17 mM	4.2.1	115	106	11	0	0	0	9.63636	4.2	30	352	8.33333
2017-09-11	Coco peat	17 mM	4.2.2	186	137	9	3	37	25	15.2222
2017-09-11	Coco peat	17 mM	4.2.3	116	109	10	0	0	0	10.9
2017-09-11	Coco peat	17 mM	4.3.1	155	145	14	0	0	0	10.3571	4.3	31	373	0
2017-09-11	Coco peat	17 mM	4.3.2	163	152	10	0	0	0	15.2
2017-09-11	Coco peat	17 mM	4.3.3	83	76	7	0	0	0	10.8571
2017-09-11	Coco peat	17 mM	4.4.1	100	93	8	0	0	0	11.625	4.4	29	301	0
2017-09-11	Coco peat	17 mM	4.4.2	109	101	11	0	0	0	9.18182
2017-09-11	Coco peat	17 mM	4.4.3	115	107	10	0	0	0	10.7
2017-09-11	Perlite	17 mM	5.1.1	113	105	10	0	0	0	10.5	5.1	32	300	0
2017-09-11	Perlite	17 mM	5.1.2	84	77	11	0	0	0	7
2017-09-11	Perlite	17 mM	5.1.3	125	118	11	0	0	0	10.7273
2017-09-11	Perlite	17 mM	5.2.1	111	104	9	0	0	0	11.5556	5.2	19	208	0
2017-09-11	Perlite	17 mM	5.2.2	110	104	10	0	0	0	10.4
2017-09-11	Perlite	17 mM	5.2.3						0
2017-09-11	Perlite	17 mM	5.3.1	121	113	10	0	0	0	11.3	5.3	25	323	0
2017-09-11	Perlite	17 mM	5.3.2	157	149	10	0	0	0	14.9
2017-09-11	Perlite	17 mM	5.3.3	65	61	5	0	0	0	12.2
2017-09-11	Perlite	17 mM	5.4.1	13	3	1	0	0	0	3	5.4	16	178	0
2017-09-11	Perlite	17 mM	5.4.2	90	85	7	0	0	0	12.1429
2017-09-11	Perlite	17 mM	5.4.3	96	90	8	0	0	0	11.25
2017-09-11	Rockwool	17 mM	6.1.1	66	60	4	0	0	0	15	6.1	16	229	0
2017-09-11	Rockwool	17 mM	6.1.2	47	43	3	0	0	0	14.3333
2017-09-11	Rockwool	17 mM	6.1.3	135	126	9	0	0	0	14
2017-09-11	Rockwool	17 mM	6.2.1	163	130	8	2	23	20	16.25	6.2	28	384	9.69697
2017-09-11	Rockwool	17 mM	6.2.2	90	85	10	0	0	0	8.5
2017-09-11	Rockwool	17 mM	6.2.3	190	169	10	1	11	9.09091	16.9
2017-09-11	Rockwool	17 mM	6.3.1	115	105	9	0	0	0	11.6667	6.3	28	305	3.33333
2017-09-11	Rockwool	17 mM	6.3.2	122	103	9	1	8	10	11.4444
2017-09-11	Rockwool	17 mM	6.3.3	106	97	10	0	0	0	9.7
2017-09-11	Rockwool	17 mM	6.4.1	145	119	8	1	17	11.1111	14.875	6.4	26	339	12.7946
2017-09-11	Rockwool	17 mM	6.4.2	111	104	10	0	0	0	10.4
2017-09-11	Rockwool	17 mM	6.4.3	146	116	8	3	21	27.2727	14.5
2017-09-11	Coco peat	34 mM	7.1.1	102	96	11	0	0	0	8.72727	7.1	30	330	0
2017-09-11	Coco peat	34 mM	7.1.2	119	112	9	0	0	0	12.4444
2017-09-11	Coco peat	34 mM	7.1.3	128	122	10	0	0	0	12.2
2017-09-11	Coco peat	34 mM	7.2.1	146	136	13	0	0	0	10.4615	7.2	34	441	5.12821
2017-09-11	Coco peat	34 mM	7.2.2	147	139	10	0	0	0	13.9
2017-09-11	Coco peat	34 mM	7.2.3	159	166	11	2	23	15.3846	15.0909
2017-09-11	Coco peat	34 mM	7.3.1	104	97	10	0	0	0	9.7	7.3	29	280	0
2017-09-11	Coco peat	34 mM	7.3.2	99	91	10	0	0	0	9.1
2017-09-11	Coco peat	34 mM	7.3.3	100	92	9	0	0	0	10.2222
2017-09-11	Coco peat	34 mM	7.4.1	35	32	4	0	0	0	8	7.4	21	139	0
2017-09-11	Coco peat	34 mM	7.4.2	73	67	10	0	0	0	6.7
2017-09-11	Coco peat	34 mM	7.4.3	45	40	7	0	0	0	5.71429
2017-09-11	Perlite	34 mM	8.1.1	122	104	9	1	11	10	11.5556	8.1	24	231	3.33333
2017-09-11	Perlite	34 mM	8.1.2	41	39	4	0	0	0	9.75
2017-09-11	Perlite	34 mM	8.1.3	96	88	11	0	0	0	8
2017-09-11	Perlite	34 mM	8.2.1	126	88	11	2	29	15.3846	8	8.2	27	183	5.12821
2017-09-11	Perlite	34 mM	8.2.2	64	60	9	0	0	0	6.66667
2017-09-11	Perlite	34 mM	8.2.3	38	35	7	0	0	0	5
2017-09-11	Perlite	34 mM	8.3.1	37	33	5	0	0	0	6.6	8.3	12	84	0
2017-09-11	Perlite	34 mM	8.3.2	28	25	4	0	0	0	6.25
2017-09-11	Perlite	34 mM	8.3.3	29	26	3	0	0	0	8.66667
2017-09-11	Perlite	34 mM	8.4.1	26	23	5	0	0	0	4.6	8.4	5	23	0
2017-09-11	Perlite	34 mM	8.4.2						0
2017-09-11	Perlite	34 mM	8.4.3						0
2017-09-11	Rockwool	34 mM	9.1.1	31	28	3	0	0	0	9.33333	9.1	3	28	0
2017-09-11	Rockwool	34 mM	9.1.2						0
2017-09-11	Rockwool	34 mM	9.1.3						0
2017-09-11	Rockwool	34 mM	9.2.1	130	81	5	4	38	44.4444	16.2	9.2	21	259	17.8451
2017-09-11	Rockwool	34 mM	9.2.2	136	117	10	1	10	9.09091	11.7
2017-09-11	Rockwool	34 mM	9.2.3	68	61	6	0	0	0	10.1667
2017-09-11	Rockwool	34 mM	9.3.1	15	10	1	0	0	0	10	9.3	2	18	0
2017-09-11	Rockwool	34 mM	9.3.2	10	8	1	0	0	0	8
2017-09-11	Rockwool	34 mM	9.3.3						0
2017-09-11	Rockwool	34 mM	9.4.1	151	137	8	1	6	11.1111	17.125	9.4	21	283	9.76431
2017-09-11	Rockwool	34 mM	9.4.2	37	33	4	0	0	0	8.25
2017-09-11	Rockwool	34 mM	9.4.3	140	113	9	2	18	18.1818	12.5556
2017-09-18	Coco peat	Control	1.1.1	129	120	10	0	0	0	12	1.1	26	316	16.6667
2017-09-18	Coco peat	Control	1.1.2	100	93	11	0	0	0	8.45455
2017-09-18	Coco peat	Control	1.1.3	111	103	5	5	53	50	20.6
2017-09-18	Coco peat	Control	1.2.1	82	77	6	0	0	0	12.8333	1.2	24	374	16.7832
2017-09-18	Coco peat	Control	1.2.2	187	150	10	3	32	23.0769	15
2017-09-18	Coco peat	Control	1.2.3	159	147	8	3	44	27.2727	18.375
2017-09-18	Coco peat	Control	1.3.1	155	141	9	1	17	10	15.6667	1.3	31	455	3.33333
2017-09-18	Coco peat	Control	1.3.2	110	101	10	0	0	0	10.1
2017-09-18	Coco peat	Control	1.3.3	224	213	12	0	0	0	17.75
2017-09-18	Coco peat	Control	1.4.1	170	160	9	0	0	0	17.7778	1.4	25	472	16.6667
2017-09-18	Coco peat	Control	1.4.2	107	97	5	5	55	50	19.4
2017-09-18	Coco peat	Control	1.4.3	224	215	11	0	0	0	19.5455
2017-09-18	Perlite	Control	2.1.1						0		2.1	19	336	6.66667
2017-09-18	Perlite	Control	2.1.2	169	160	8	2	28	20	20
2017-09-18	Perlite	Control	2.1.3	186	176	11	0	0	0	16
2017-09-18	Perlite	Control	2.2.1						0		2.2	16	256	0
2017-09-18	Perlite	Control	2.2.2	52	48	4	0	0	0	12
2017-09-18	Perlite	Control	2.2.3	220	208	12	0	0	0	17.3333
2017-09-18	Perlite	Control	2.3.1	93	88	6	0	0	0	14.6667	2.3	23	339	0
2017-09-18	Perlite	Control	2.3.2	118	110	7	0	0	0	15.7143
2017-09-18	Perlite	Control	2.3.3	150	141	10	0	0	0	14.1
2017-09-18	Perlite	Control	2.4.1	117	108	9	0	0	0	12	2.4	18	222	0
2017-09-18	Perlite	Control	2.4.2	52	47	4	0	0	0	11.75
2017-09-18	Perlite	Control	2.4.3	75	67	5	0	0	0	13.4
2017-09-18	Rockwool	Control	3.1.1	98	89	7	1	26	12.5	12.7143	3.1	27	499	4.16667
2017-09-18	Rockwool	Control	3.1.2	229	217	10	0	0	0	21.7
2017-09-18	Rockwool	Control	3.1.3	202	193	10	0	0	0	19.3
2017-09-18	Rockwool	Control	3.2.1	146	137	9	1	11	10	15.2222	3.2	25	414	18.7179
2017-09-18	Rockwool	Control	3.2.2	190	180	9	0	0	0	20
2017-09-18	Rockwool	Control	3.2.3	106	97	7	6	53	46.1538	13.8571
2017-09-18	Rockwool	Control	3.3.1	103	89	6	5	62	45.4545	14.8333	3.3	22	358	25.5219
2017-09-18	Rockwool	Control	3.3.2	147	137	8	1	16	11.1111	17.125
2017-09-18	Rockwool	Control	3.3.3	141	132	8	2	18	20	16.5
2017-09-18	Rockwool	Control	3.4.1	206	195	11	0	0	0	17.7273	3.4	29	546	15.3846
2017-09-18	Rockwool	Control	3.4.2	148	131	7	6	44	46.1538	18.7143
2017-09-18	Rockwool	Control	3.4.3	232	220	11	0	0	0	20
2017-09-18	Coco peat	17 mM	4.1.1	147	136	11	1	13	8.33333	12.3636	4.1	35	510	2.77778
2017-09-18	Coco peat	17 mM	4.1.2	184	173	12	0	0	0	14.4167
2017-09-18	Coco peat	17 mM	4.1.3	210	201	12	0	0	0	16.75
2017-09-18	Coco peat	17 mM	4.2.1	189	179	12	1	6	7.69231	14.9167	4.2	31	438	2.5641
2017-09-18	Coco peat	17 mM	4.2.2	140	130	10	0	0	0	13
2017-09-18	Coco peat	17 mM	4.2.3	137	129	9	0	0	0	14.3333
2017-09-18	Coco peat	17 mM	4.3.1	90	83	10	0	0	0	8.3	4.3	28	267	3.33333
2017-09-18	Coco peat	17 mM	4.3.2	92	86	9	0	0	0	9.55556
2017-09-18	Coco peat	17 mM	4.3.3	106	98	9	1	6	10	10.8889
2017-09-18	Coco peat	17 mM	4.4.1	148	137	8	3	34	27.2727	17.125	4.4	28	441	14.6465
2017-09-18	Coco peat	17 mM	4.4.2	148	139	10	0	0	0	13.9
2017-09-18	Coco peat	17 mM	4.4.3	173	165	10	2	18	16.6667	16.5
2017-09-18	Perlite	17 mM	5.1.1	77	72	9	0	0	0	8	5.1	25	252	0
2017-09-18	Perlite	17 mM	5.1.2	120	113	10	0	0	0	11.3
2017-09-18	Perlite	17 mM	5.1.3	72	67	6	0	0	0	11.1667
2017-09-18	Perlite	17 mM	5.2.1	25	20	4	0	0	0	5	5.2	14	134	0
2017-09-18	Perlite	17 mM	5.2.2	96	92	8	0	0	0	11.5
2017-09-18	Perlite	17 mM	5.2.3	24	22	2	0	0	0	11
2017-09-18	Perlite	17 mM	5.3.1	133	125	8	0	0	0	15.625	5.3	23	321	0
2017-09-18	Perlite	17 mM	5.3.2	118	111	9	0	0	0	12.3333
2017-09-18	Perlite	17 mM	5.3.3	92	85	6	0	0	0	14.1667
2017-09-18	Perlite	17 mM	5.4.1						0		5.4	11	143	8.33333
2017-09-18	Perlite	17 mM	5.4.2	88	79	6	2	24	25	13.1667
2017-09-18	Perlite	17 mM	5.4.3	69	64	5	0	0	0	12.8
2017-09-18	Rockwool	17 mM	6.1.1	78	68	9	1	8	10	7.55556	6.1	928	278	6.66667
2017-09-18	Rockwool	17 mM	6.1.2	116	107	9	1	12	10	11.8889
2017-09-18	Rockwool	17 mM	6.1.3	111	103	910	0	0	0	0.113187
2017-09-18	Rockwool	17 mM	6.2.1	75	67	6	1	10	14.2857	11.1667	6.2	20	305	15.873
2017-09-18	Rockwool	17 mM	6.2.2	112	96	6	3	54	33.3333	16
2017-09-18	Rockwool	17 mM	6.2.3	152	142	8	0	0	0	17.75
2017-09-18	Rockwool	17 mM	6.3.1	95	85	7	0	0	0	12.1429	6.3	26	315	0
2017-09-18	Rockwool	17 mM	6.3.2	111	103	10	0	0	0	10.3
2017-09-18	Rockwool	17 mM	6.3.3	135	127	9	0	0	0	14.1111
2017-09-18	Rockwool	17 mM	6.4.1	125	115	9	0	0	0	12.7778	6.4	31	445	3.0303
2017-09-18	Rockwool	17 mM	6.4.2	157	147	10	1	13	9.09091	14.7
2017-09-18	Rockwool	17 mM	6.4.3	194	183	12	0	0	0	15.25
2017-09-18	Coco peat	34 mM	7.1.1	114	105	10	1	14	9.09091	10.5	7.1	31	366	6.06061
2017-09-18	Coco peat	34 mM	7.1.2	144	134	10	1	13	9.09091	13.4
2017-09-18	Coco peat	34 mM	7.1.3	136	127	11	0	0	0	11.5455
2017-09-18	Coco peat	34 mM	7.2.1	124	115	11	0	0	0	10.4545	7.2	28	330	13.3333
2017-09-18	Coco peat	34 mM	7.2.2	88	80	6	4	29	40	13.3333
2017-09-18	Coco peat	34 mM	7.2.3	144	135	11	0	0	0	12.2727
2017-09-18	Coco peat	34 mM	7.3.1	79	71	8	0	0	0	8.875	7.3	24	248	4.16667
2017-09-18	Coco peat	34 mM	7.3.2	92	82	9	0	0	0	9.11111
2017-09-18	Coco peat	34 mM	7.3.3	101	95	7	1	6	12.5	13.5714
2017-09-18	Coco peat	34 mM	7.4.1	92	85	6	4	44	40	14.1667	7.4	26	292	31.3889
2017-09-18	Coco peat	34 mM	7.4.2	75	70	10	6	0	37.5	7
2017-09-18	Coco peat	34 mM	7.4.3	159	137	10	2	16	16.6667	13.7
2017-09-18	Perlite	34 mM	8.1.1	89	81	7	0	0	0	11.5714	8.1	20	269	0
2017-09-18	Perlite	34 mM	8.1.2	53	47	4	0	0	0	11.75
2017-09-18	Perlite	34 mM	8.1.3	150	141	9	0	0	0	15.6667
2017-09-18	Perlite	34 mM	8.2.1						0		8.2	7	88	6.66667
2017-09-18	Perlite	34 mM	8.2.2	36	42	3	0	0	0	14
2017-09-18	Perlite	34 mM	8.2.3	52	46	4	1	11	20	11.5
2017-09-18	Perlite	34 mM	8.3.1	135	127	11	0	0	0	11.5455	8.3	26	265	0
2017-09-18	Perlite	34 mM	8.3.2	126	117	13	0	0	0	9
2017-09-18	Perlite	34 mM	8.3.3	24	21	2	0	0	0	10.5
2017-09-18	Perlite	34 mM	8.4.1	53	47	4	0	0	0	11.75	8.4	7	73	0
2017-09-18	Perlite	34 mM	8.4.2	30	26	3	0	0	0	8.66667
2017-09-18	Perlite	34 mM	8.4.3						0
2017-09-18	Rockwool	34 mM	9.1.1	99	92	8	0	0	0	11.5	9.1	28	342	0
2017-09-18	Rockwool	34 mM	9.1.2	138	131	11	0	0	0	11.9091
2017-09-18	Rockwool	34 mM	9.1.3	128	119	9	0	0	0	13.2222
2017-09-18	Rockwool	34 mM	9.2.1	128	121	10	0	0	0	12.1	9.2	29	296	0
2017-09-18	Rockwool	34 mM	9.2.2	44	40	9	0	0	0	4.44444
2017-09-18	Rockwool	34 mM	9.2.3	145	135	10	0	0	0	13.5
2017-09-18	Rockwool	34 mM	9.3.1	20	17	2	0	0	0	8.5	9.3	3	22	0
2017-09-18	Rockwool	34 mM	9.3.2						0
2017-09-18	Rockwool	34 mM	9.3.3	8	5	1	0	0	0	5
2017-09-18	Rockwool	34 mM	9.4.1	68	79	6	0	0	0	13.1667	9.4	25	280	0
2017-09-18	Rockwool	34 mM	9.4.2	162	143	12	0	0	0	11.9167
2017-09-18	Rockwool	34 mM	9.4.3	64	58	7	0	0	0	8.28571
2017-09-25	Coco peat	Control	1.1.1	179	169	9	3	40	25	18.7778	1.1	35	535	8.33333
2017-09-25	Coco peat	Control	1.1.2	194	184	11	0	0	0	16.7273
2017-09-25	Coco peat	Control	1.1.3	190	182	15	0	0	0	12.1333
2017-09-25	Coco peat	Control	1.2.1	144	136	11	0	0	0	12.3636	1.2	17	217	11.1111
2017-09-25	Coco peat	Control	1.2.2						0
2017-09-25	Coco peat	Control	1.2.3	89	81	6	3	35	33.3333	13.5
2017-09-25	Coco peat	Control	1.3.1	147	139	10	0	0	0	13.9	1.3	32	426	0
2017-09-25	Coco peat	Control	1.3.2	151	146	11	0	0	0	13.2727
2017-09-25	Coco peat	Control	1.3.3	150	141	11	0	0	0	12.8182
2017-09-25	Coco peat	Control	1.4.1	150	142	11	0	0	0	12.9091	1.4	31	480	0
2017-09-25	Coco peat	Control	1.4.2	150	140	10	0	0	0	14
2017-09-25	Coco peat	Control	1.4.3	208	198	10	0	0	0	19.8
2017-09-25	Perlite	Control	2.1.1	140	133	11	0	0	0	12.0909	2.1	30	380	0
2017-09-25	Perlite	Control	2.1.2	141	134	9	0	0	0	14.8889
2017-09-25	Perlite	Control	2.1.3	122	113	10	0	0	0	11.3
2017-09-25	Perlite	Control	2.2.1	127	119	8	0	0	0	14.875	2.2	25	336	0
2017-09-25	Perlite	Control	2.2.2	140	132	10	0	0	0	13.2
2017-09-25	Perlite	Control	2.2.3	93	85	7	0	0	0	12.1429
2017-09-25	Perlite	Control	2.3.1	155	147	9	0	0	0	16.3333	2.3	29	412	0
2017-09-25	Perlite	Control	2.3.2	117	110	9	0	0	0	12.2222
2017-09-25	Perlite	Control	2.3.3	166	155	11	0	0	0	14.0909
2017-09-25	Perlite	Control	2.4.1	181	165	11	2	33	15.3846	15	2.4	33	461	5.12821
2017-09-25	Perlite	Control	2.4.2	157	146	11	0	0	0	13.2727
2017-09-25	Perlite	Control	2.4.3	159	150	11	0	0	0	13.6364
2017-09-25	Rockwool	Control	3.1.1	194	185	12	0	0	0	15.4167	3.1	30	466	3.33333
2017-09-25	Rockwool	Control	3.1.2	164	153	9	0	0	0	17
2017-09-25	Rockwool	Control	3.1.3	139	128	9	1	12	10	14.2222
2017-09-25	Rockwool	Control	3.2.1	98	89	9	0	0	0	9.88889	3.2	30	364	0
2017-09-25	Rockwool	Control	3.2.2	138	129	11	0	0	0	11.7273
2017-09-25	Rockwool	Control	3.2.3	154	146	10	0	0	0	14.6
2017-09-25	Rockwool	Control	3.3.1	52	44	4	0	0	0	11	3.3	21	266	0
2017-09-25	Rockwool	Control	3.3.2	87	80	8	0	0	0	10
2017-09-25	Rockwool	Control	3.3.3	149	142	9	0	0	0	15.7778
2017-09-25	Rockwool	Control	3.4.1	135	122	11	0	0	0	11.0909	3.4	31	504	6.06061
2017-09-25	Rockwool	Control	3.4.2	235	220	11	0	0	0	20
2017-09-25	Rockwool	Control	3.4.3	171	162	9	2	27	18.1818	18
2017-09-25	Coco peat	17 mM	4.1.1	78	72	6	2	31	25	12	4.1	17	221	8.33333
2017-09-25	Coco peat	17 mM	4.1.2	134	130	10	0	0	0	13
2017-09-25	Coco peat	17 mM	4.1.3	22	19	1	0	0	0	19
2017-09-25	Coco peat	17 mM	4.2.1	152	141	8	2	18	20	17.625	4.2	30	371	13.3333
2017-09-25	Coco peat	17 mM	4.2.2	163	119	14	0	0	0	8.5
2017-09-25	Coco peat	17 mM	4.2.3	120	111	8	2	25	20	13.875
2017-09-25	Coco peat	17 mM	4.3.1	174	163	10	2	31	16.6667	16.3	4.3	32	465	8.11966
2017-09-25	Coco peat	17 mM	4.3.2	171	160	12	1	13	7.69231	13.3333
2017-09-25	Coco peat	17 mM	4.3.3	151	142	10	0	0	0	14.2
2017-09-25	Coco peat	17 mM	4.4.1						0		4.4	5	49	0
2017-09-25	Coco peat	17 mM	4.4.2						0
2017-09-25	Coco peat	17 mM	4.4.3	55	49	5	0	0	0	9.8
2017-09-25	Perlite	17 mM	5.1.1	124	115	9	2	24	18.1818	12.7778	5.1	33	415	6.06061
2017-09-25	Perlite	17 mM	5.1.2	206	195	12	0	0	0	16.25
2017-09-25	Perlite	17 mM	5.1.3	112	105	12	0	0	0	8.75
2017-09-25	Perlite	17 mM	5.2.1	99	90	11	0	0	0	8.18182	5.2	26	247	0
2017-09-25	Perlite	17 mM	5.2.2	37	33	2	0	0	0	16.5
2017-09-25	Perlite	17 mM	5.2.3	132	124	13	0	0	0	9.53846
2017-09-25	Perlite	17 mM	5.3.1	156	147	9	2	31	18.1818	16.3333	5.3	28	413	6.06061
2017-09-25	Perlite	17 mM	5.3.2	141	133	9	0	0	0	14.7778
2017-09-25	Perlite	17 mM	5.3.3	140	133	10	0	0	0	13.3
2017-09-25	Perlite	17 mM	5.4.1	104	97	9	0	0	0	10.7778	5.4	29	354	0
2017-09-25	Perlite	17 mM	5.4.2	109	95	8	0	0	0	11.875
2017-09-25	Perlite	17 mM	5.4.3	173	162	12	0	0	0	13.5
2017-09-25	Rockwool	17 mM	6.1.1						0		6.1	13	120	33.3333
2017-09-25	Rockwool	17 mM	6.1.2	0	0	0	2	18	100
2017-09-25	Rockwool	17 mM	6.1.3	126	120	13	0	0	0	9.23077
2017-09-25	Rockwool	17 mM	6.2.1	14	12	1	0	0	0	12	6.2	12	134	0
2017-09-25	Rockwool	17 mM	6.2.2						0
2017-09-25	Rockwool	17 mM	6.2.3	134	122	11	0	0	0	11.0909
2017-09-25	Rockwool	17 mM	6.3.1	114	106	10	0	0	0	10.6	6.3	18	193	0
2017-09-25	Rockwool	17 mM	6.3.2	24	18	2	0	0	0	9
2017-09-25	Rockwool	17 mM	6.3.3	75	69	6	0	0	0	11.5
2017-09-25	Rockwool	17 mM	6.4.1	136	128	12	0	0	0	10.6667	6.4	24	244	0
2017-09-25	Rockwool	17 mM	6.4.2						0
2017-09-25	Rockwool	17 mM	6.4.3	124	116	12	0	0	0	9.66667
2017-09-25	Coco peat	34 mM	7.1.1	53	47	7	0	0	0	6.71429	7.1	20	186	3.33333
2017-09-25	Coco peat	34 mM	7.1.2	118	109	9	1	10	10	12.1111
2017-09-25	Coco peat	34 mM	7.1.3	36	30	4	0	0	0	7.5
2017-09-25	Coco peat	34 mM	7.2.1						0		7.2	1	12	0
2017-09-25	Coco peat	34 mM	7.2.2	13	12	1	0	0	0	12
2017-09-25	Coco peat	34 mM	7.2.3						0
2017-09-25	Coco peat	34 mM	7.3.1	40	31	2	6	60	75	15.5	7.3	8	66	25
2017-09-25	Coco peat	34 mM	7.3.2						0
2017-09-25	Coco peat	34 mM	7.3.3	41	35	6	0	0	0	5.83333
2017-09-25	Coco peat	34 mM	7.4.1	132	124	9	1	12	10	13.7778	7.4	19	237	12.4242
2017-09-25	Coco peat	34 mM	7.4.2	19	16	2	0	0	0	8
2017-09-25	Coco peat	34 mM	7.4.3	105	97	8	3	31	27.2727	12.125
2017-09-25	Perlite	34 mM	8.1.1	124	115	11	0	0	0	10.4545	8.1	31	331	0
2017-09-25	Perlite	34 mM	8.1.2	92	89	9	0	0	0	9.88889
2017-09-25	Perlite	34 mM	8.1.3	135	127	11	0	0	0	11.5455
2017-09-25	Perlite	34 mM	8.2.1	112	103	8	2	16	20	12.875	8.2	21	240	6.66667
2017-09-25	Perlite	34 mM	8.2.2	96	89	8	0	0	0	11.125
2017-09-25	Perlite	34 mM	8.2.3	50	48	5	0	0	0	9.6
2017-09-25	Perlite	34 mM	8.3.1	88	83	9	0	0	0	9.22222	8.3	25	264	0
2017-09-25	Perlite	34 mM	8.3.2	60	55	6	0	0	0	9.16667
2017-09-25	Perlite	34 mM	8.3.3	134	126	10	0	0	0	12.6
2017-09-25	Perlite	34 mM	8.4.1	101	94	9	0	0	0	10.4444	8.4	9	94	0
2017-09-25	Perlite	34 mM	8.4.2						0
2017-09-25	Perlite	34 mM	8.4.3						0
2017-09-25	Rockwool	34 mM	9.1.1	77	71	8	0	0	0	8.875	9.1	26	224	0
2017-09-25	Rockwool	34 mM	9.1.2	71	64	10	0	0	0	6.4
2017-09-25	Rockwool	34 mM	9.1.3	97	89	8	0	0	0	11.125
2017-09-25	Rockwool	34 mM	9.2.1	72	65	7	0	0	0	9.28571	9.2	18	195	0
2017-09-25	Rockwool	34 mM	9.2.2	139	130	11	0	0	0	11.8182
2017-09-25	Rockwool	34 mM	9.2.3						0
2017-09-25	Rockwool	34 mM	9.3.1	112	106	10	0	0	0	10.6	9.3	28	289	3.7037
2017-09-25	Rockwool	34 mM	9.3.2	99	91	10	0	0	0	9.1
2017-09-25	Rockwool	34 mM	9.3.3	102	92	8	1	10	11.1111	11.5
2017-09-25	Rockwool	34 mM	9.4.1	155	145	12	0	0	0	12.0833	9.4	32	333	3.0303
2017-09-25	Rockwool	34 mM	9.4.2	104	97	10	0	0	0	9.7
2017-09-25	Rockwool	34 mM	9.4.3	103	91	10	1	12	9.09091	9.1
2017-10-03	Coco peat	Control	1.1.1	143	137	9	0	0	0	15.2222	1.1	27	376	0
2017-10-03	Coco peat	Control	1.1.2	114	103	9	0	0	0	11.4444
2017-10-03	Coco peat	Control	1.1.3	144	136	9	0	0	0	15.1111
2017-10-03	Coco peat	Control	1.2.1	86	78	7	0	0	0	11.1429	1.2	22	271	0
2017-10-03	Coco peat	Control	1.2.2	112	99	7	0	0	0	14.1429
2017-10-03	Coco peat	Control	1.2.3	100	94	8	0	0	0	11.75
2017-10-03	Coco peat	Control	1.3.1	134	126	7	0	0	0	18	1.3	16	238	0
2017-10-03	Coco peat	Control	1.3.2	22	20	2	0	0	0	10
2017-10-03	Coco peat	Control	1.3.3	98	92	7	0	0	0	13.1429
2017-10-03	Coco peat	Control	1.4.1	83	78	6	0	0	0	13	1.4	21	320	0
2017-10-03	Coco peat	Control	1.4.2	110	104	7	0	0	0	14.8571
2017-10-03	Coco peat	Control	1.4.3	149	138	8	0	0	0	17.25
2017-10-03	Perlite	Control	2.1.1	139	131	8	0	0	0	16.375	2.1	23	355	0
2017-10-03	Perlite	Control	2.1.2	108	101	7	0	0	0	14.4286
2017-10-03	Perlite	Control	2.1.3	130	123	8	0	0	0	15.375
2017-10-03	Perlite	Control	2.2.1	58	53	6	0	0	0	8.83333	2.2	23	332	0
2017-10-03	Perlite	Control	2.2.2	122	113	7	0	0	0	16.1429
2017-10-03	Perlite	Control	2.2.3	175	166	10	0	0	0	16.6
2017-10-03	Perlite	Control	2.3.1	133	126	8	0	0	0	15.75	2.3	24	347	0
2017-10-03	Perlite	Control	2.3.2	125	115	8	0	0	0	14.375
2017-10-03	Perlite	Control	2.3.3	113	106	8	0	0	0	13.25
2017-10-03	Perlite	Control	2.4.1	163	155	10	0	0	0	15.5	2.4	26	431	0
2017-10-03	Perlite	Control	2.4.2	151	142	8	0	0	0	17.75
2017-10-03	Perlite	Control	2.4.3	144	134	8	0	0	0	16.75
2017-10-03	Rockwool	Control	3.1.1	60	57	4	0	0	0	14.25	3.1	20	340	0
2017-10-03	Rockwool	Control	3.1.2	82	72	5	0	0	0	14.4
2017-10-03	Rockwool	Control	3.1.3	222	211	11	0	0	0	19.1818
2017-10-03	Rockwool	Control	3.2.1	139	127	8	0	0	0	15.875	3.2	26	339	0
2017-10-03	Rockwool	Control	3.2.2	92	84	9	0	0	0	9.33333
2017-10-03	Rockwool	Control	3.2.3	136	128	9	0	0	0	14.2222
2017-10-03	Rockwool	Control	3.3.1	111	100	9	0	0	0	11.1111	3.3	24	282	0
2017-10-03	Rockwool	Control	3.3.2	107	104	8	0	0	0	13
2017-10-03	Rockwool	Control	3.3.3	88	78	7	0	0	0	11.1429
2017-10-03	Rockwool	Control	3.4.1	119	110	8	2	26	20	13.75	3.4	28	438	6.66667
2017-10-03	Rockwool	Control	3.4.2	167	155	10	0	0	0	15.5
2017-10-03	Rockwool	Control	3.4.3	182	173	10	0	0	0	17.3
2017-10-03	Coco peat	17 mM	4.1.1	64	57	6	0	0	0	9.5	4.1	20	229	0
2017-10-03	Coco peat	17 mM	4.1.2	131	125	9	0	0	0	13.8889
2017-10-03	Coco peat	17 mM	4.1.3	52	47	5	0	0	0	9.4
2017-10-03	Coco peat	17 mM	4.2.1	78	71	7	0	0	0	10.1429	4.2	23	244	5.55556
2017-10-03	Coco peat	17 mM	4.2.2	66	62	6	0	0	0	10.3333
2017-10-03	Coco peat	17 mM	4.2.3	120	111	10	2	20	16.6667	11.1
2017-10-03	Coco peat	17 mM	4.3.1	149	140	11	1	10	8.33333	12.7273	4.3	33	382	2.77778
2017-10-03	Coco peat	17 mM	4.3.2	136	127	12	0	0	0	10.5833
2017-10-03	Coco peat	17 mM	4.3.3	123	115	10	0	0	0	11.5
2017-10-03	Coco peat	17 mM	4.4.1						0		4.4	0	0	0
2017-10-03	Coco peat	17 mM	4.4.2						0
2017-10-03	Coco peat	17 mM	4.4.3						0
2017-10-03	Perlite	17 mM	5.1.1	59	54	5	0	0	0	10.8	5.1	15	202	0
2017-10-03	Perlite	17 mM	5.1.2	18	16	1	0	0	0	16
2017-10-03	Perlite	17 mM	5.1.3	140	132	9	0	0	0	14.6667
2017-10-03	Perlite	17 mM	5.2.1	63	58	4	0	0	0	14.5	5.2	23	330	0
2017-10-03	Perlite	17 mM	5.2.2	74	66	5	0	0	0	13.2
2017-10-03	Perlite	17 mM	5.2.3	22	206	14	0	0	0	14.7143
2017-10-03	Perlite	17 mM	5.3.1	99	94	8	0	0	0	11.75	5.3	27	334	0
2017-10-03	Perlite	17 mM	5.3.2	158	150	12	0	0	0	12.5
2017-10-03	Perlite	17 mM	5.3.3	96	90	7	0	0	0	12.8571
2017-10-03	Perlite	17 mM	5.4.1	87	79	5	0	0	0	15.8	5.4	10	144	0
2017-10-03	Perlite	17 mM	5.4.2	77	65	5	0	0	0	13
2017-10-03	Perlite	17 mM	5.4.3						0
2017-10-03	Rockwool	17 mM	6.1.1	74	69	6	0	0	0	11.5	6.1	18	223	0
2017-10-03	Rockwool	17 mM	6.1.2	65	60	5	0	0	0	12
2017-10-03	Rockwool	17 mM	6.1.3	100	94	7	0	0	0	13.4286
2017-10-03	Rockwool	17 mM	6.2.1	81	74	7	0	0	0	10.5714	6.2	24	284	0
2017-10-03	Rockwool	17 mM	6.2.2	113	105	9	0	0	0	11.6667
2017-10-03	Rockwool	17 mM	6.2.3	112	105	8	0	0	0	13.125
2017-10-03	Rockwool	17 mM	6.3.1	108	99	8	0	0	0	12.375	6.3	23	231	0
2017-10-03	Rockwool	17 mM	6.3.2	73	66	7	0	0	0	9.42857
2017-10-03	Rockwool	17 mM	6.3.3	72	66	8	0	0	0	8.25
2017-10-03	Rockwool	17 mM	6.4.1	118	111	10	0	0	0	11.1	6.4	27	322	6.66667
2017-10-03	Rockwool	17 mM	6.4.2	118	111	9	0	0	0	12.3333
2017-10-03	Rockwool	17 mM	6.4.3	109	100	8	2	25	20	12.5
2017-10-03	Coco peat	34 mM	7.1.1	56	42	5	0	0	0	8.4	7.1	23	195	5.55556
2017-10-03	Coco peat	34 mM	7.1.2	46	40	8	0	0	0	5
2017-10-03	Coco peat	34 mM	7.1.3	121	113	10	2	28	16.6667	11.3
2017-10-03	Coco peat	34 mM	7.2.1	119	110	9	1	8	10	12.2222	7.2	30	309	3.33333
2017-10-03	Coco peat	34 mM	7.2.2	109	102	10	0	0	0	10.2
2017-10-03	Coco peat	34 mM	7.2.3	103	97	11	0	0	0	8.81818
2017-10-03	Coco peat	34 mM	7.3.1	27	23	7	0	0	0	3.28571	7.3	22	147	3.7037
2017-10-03	Coco peat	34 mM	7.3.2	74	69	8	1	9	11.1111	8.625
2017-10-03	Coco peat	34 mM	7.3.3	61	55	7	0	0	0	7.85714
2017-10-03	Coco peat	34 mM	7.4.1	54	49	4	0	0	0	12.25	7.4	16	174	0
2017-10-03	Coco peat	34 mM	7.4.2	78	68	7	0	0	0	9.71429
2017-10-03	Coco peat	34 mM	7.4.3	61	57	5	0	0	0	11.4
2017-10-03	Perlite	34 mM	8.1.1	88	82	7	0	0	0	11.7143	8.1	22	215	0
2017-10-03	Perlite	34 mM	8.1.2	77	71	7	0	0	0	10.1429
2017-10-03	Perlite	34 mM	8.1.3	70	62	8	0	0	0	7.75
2017-10-03	Perlite	34 mM	8.2.1	43	38	5	0	0	0	7.6	8.2	20	216	0
2017-10-03	Perlite	34 mM	8.2.2	68	63	5	0	0	0	12.6
2017-10-03	Perlite	34 mM	8.2.3	123	115	10	0	0	0	11.5
2017-10-03	Perlite	34 mM	8.3.1	80	73	11	0	0	0	6.63636	8.3	24	207	0
2017-10-03	Perlite	34 mM	8.3.2	48	43	5	0	0	0	8.6
2017-10-03	Perlite	34 mM	8.3.3	96	91	8	0	0	0	11.375
2017-10-03	Perlite	34 mM	8.4.1	87	79	5	0	0	0	15.8	8.4	22	253	0
2017-10-03	Perlite	34 mM	8.4.2	96	88	8	0	0	0	11
2017-10-03	Perlite	34 mM	8.4.3	93	86	9	0	0	0	9.55556
2017-10-03	Rockwool	34 mM	9.1.1	96	89	8	0	0	0	11.125	9.1	28	312	0
2017-10-03	Rockwool	34 mM	9.1.2	158	150	10	0	0	0	15
2017-10-03	Rockwool	34 mM	9.1.3	80	73	10	0	0	0	7.3
2017-10-03	Rockwool	34 mM	9.2.1	99	91	8	0	0	0	11.375	9.2	27	318	0
2017-10-03	Rockwool	34 mM	9.2.2	108	98	10	0	0	0	9.8
2017-10-03	Rockwool	34 mM	9.2.3	136	129	9	0	0	0	14.3333
2017-10-03	Rockwool	34 mM	9.3.1	111	103	9	0	0	0	11.4444	9.3	24	249	0
2017-10-03	Rockwool	34 mM	9.3.2	109	101	10	0	0	0	10.1
2017-10-03	Rockwool	34 mM	9.3.3	51	45	5	0	0	0	9
2017-10-03	Rockwool	34 mM	9.4.1	81	71	10	0	0	0	7.1	9.4	31	335	3.33333
2017-10-03	Rockwool	34 mM	9.4.2	112	104	9	1	20	10	11.5556
2017-10-03	Rockwool	34 mM	9.4.3	171	160	12	0	0	0	13.3333
2017-10-10	Coco peat	Control	1.1.1	148	140	8	0	0	0	17.5	1.1	27	432	0
2017-10-10	Coco peat	Control	1.1.2	163	153	9	0	0	0	17
2017-10-10	Coco peat	Control	1.1.3	145	139	10	0	0	0	13.9
2017-10-10	Coco peat	Control	1.2.1	147	138	9	0	0	0	15.3333	1.2	27	400	0
2017-10-10	Coco peat	Control	1.2.2	154	146	10	0	0	0	14.6
2017-10-10	Coco peat	Control	1.2.3	125	116	8	0	0	0	14.5
2017-10-10	Coco peat	Control	1.3.1	140	133	10	0	0	0	13.3	1.3	28	411	0
2017-10-10	Coco peat	Control	1.3.2	140	133	8	0	0	0	16.625
2017-10-10	Coco peat	Control	1.3.3	150	145	10	0	0	0	14.5
2017-10-10	Coco peat	Control	1.4.1	186	178	10	0	0	0	17.8	1.4	25	401	0
2017-10-10	Coco peat	Control	1.4.2	140	131	7	0	0	0	18.7143
2017-10-10	Coco peat	Control	1.4.3	99	92	8	0	0	0	11.5
2017-10-10	Perlite	Control	2.1.1	120	113	8	0	0	0	14.125	2.1	23	381	0
2017-10-10	Perlite	Control	2.1.2	105	100	5	0	0	0	20
2017-10-10	Perlite	Control	2.1.3	177	168	10	0	0	0	16.8
2017-10-10	Perlite	Control	2.2.1	170	159	10	1	20	9.09091	15.9	2.2	27	454	3.0303
2017-10-10	Perlite	Control	2.2.2	175	164	10	0	0	0	16.4
2017-10-10	Perlite	Control	2.2.3	139	131	7	0	0	0	18.7143
2017-10-10	Perlite	Control	2.3.1	166	159	10	0	0	0	15.9	2.3	28	491	6.66667
2017-10-10	Perlite	Control	2.3.2	188	178	10	0	0	0	17.8
2017-10-10	Perlite	Control	2.3.3	162	154	8	2	21	20	19.25
2017-10-10	Perlite	Control	2.4.1	137	129	9	0	0	0	14.3333	2.4	25	380	6.06061
2017-10-10	Perlite	Control	2.4.2	118	111	7	0	0	0	15.8571
2017-10-10	Perlite	Control	2.4.3	149	140	9	2	23	18.1818	15.5556
2017-10-10	Rockwool	Control	3.1.1	139	130	9	0	0	0	14.4444	3.1	19	285	0
2017-10-10	Rockwool	Control	3.1.2	105	98	6	0	0	0	16.3333
2017-10-10	Rockwool	Control	3.1.3	64	57	4	0	0	0	14.25
2017-10-10	Rockwool	Control	3.2.1	139	129	9	0	0	0	14.3333	3.2	30	404	0
2017-10-10	Rockwool	Control	3.2.2	147	138	11	0	0	0	12.5455
2017-10-10	Rockwool	Control	3.2.3	146	137	10	0	0	0	13.7
2017-10-10	Rockwool	Control	3.3.1	159	148	11	0	0	0	13.4545	3.3	29	411	0
2017-10-10	Rockwool	Control	3.3.2	165	155	11	0	0	0	14.0909
2017-10-10	Rockwool	Control	3.3.3	114	108	7	0	0	0	15.4286
2017-10-10	Rockwool	Control	3.4.1	154	146	10	1	14	9.09091	14.6	3.4	26	393	6.73401
2017-10-10	Rockwool	Control	3.4.2	144	137	8	0	0	0	17.125
2017-10-10	Rockwool	Control	3.4.3	117	110	8	1	9	11.1111	13.75
2017-10-10	Coco peat	17 mM	4.1.1	169	162	11	0	0	0	14.7273	4.1	24	343	0
2017-10-10	Coco peat	17 mM	4.1.2	187	181	13	0	0	0	13.9231
2017-10-10	Coco peat	17 mM	4.1.3						0
2017-10-10	Coco peat	17 mM	4.2.1	115	110	8	0	0	0	13.75	4.2	26	312	3.7037
2017-10-10	Coco peat	17 mM	4.2.2	104	97	8	1	8	11.1111	12.125
2017-10-10	Coco peat	17 mM	4.2.3	112	105	10	0	0	0	10.5
2017-10-10	Coco peat	17 mM	4.3.1	133	127	12	0	0	0	10.5833	4.3	31	337	0
2017-10-10	Coco peat	17 mM	4.3.2	112	106	9	0	0	0	11.7778
2017-10-10	Coco peat	17 mM	4.3.3	110	104	10	0	0	0	10.4
2017-10-10	Coco peat	17 mM	4.4.1	135	128	8	1	9	11.1111	16	4.4	26	386	7.03704
2017-10-10	Coco peat	17 mM	4.4.2	129	121	9	0	0	0	13.4444
2017-10-10	Coco peat	17 mM	4.4.3	144	137	9	1	12	10	15.2222
2017-10-10	Perlite	17 mM	5.1.1	218	207	16	1	10	5.88235	12.9375	5.1	35	498	1.96078
2017-10-10	Perlite	17 mM	5.1.2	187	178	11	0	0	0	16.1818
2017-10-10	Perlite	17 mM	5.1.3	119	113	8	0	0	0	14.125
2017-10-10	Perlite	17 mM	5.2.1						0		5.2	21	310	0
2017-10-10	Perlite	17 mM	5.2.2	122	114	8	0	0	0	14.25
2017-10-10	Perlite	17 mM	5.2.3	208	196	13	0	0	0	15.0769
2017-10-10	Perlite	17 mM	5.3.1	102	95	6	0	0	0	15.8333	5.3	18	233	0
2017-10-10	Perlite	17 mM	5.3.2	76	70	6	0	0	0	11.6667
2017-10-10	Perlite	17 mM	5.3.3	76	68	6	0	0	0	11.3333
2017-10-10	Perlite	17 mM	5.4.1	163	157	10	0	0	0	15.7	5.4	31	429	0
2017-10-10	Perlite	17 mM	5.4.2	113	106	9	0	0	0	11.7778
2017-10-10	Perlite	17 mM	5.4.3	177	166	12	0	0	0	13.8333
2017-10-10	Rockwool	17 mM	6.1.1						0		6.1	22	253	0
2017-10-10	Rockwool	17 mM	6.1.2	137	131	13	0	0	0	10.0769
2017-10-10	Rockwool	17 mM	6.1.3	128	122	9	0	0	0	13.5556
2017-10-10	Rockwool	17 mM	6.2.1	163	155	10	0	0	0	15.5	6.2	28	431	3.33333
2017-10-10	Rockwool	17 mM	6.2.2	138	130	9	1	10	10	14.4444
2017-10-10	Rockwool	17 mM	6.2.3	155	146	9	0	0	0	16.2222
2017-10-10	Rockwool	17 mM	6.3.1	133	125	10	0	0	0	12.5	6.3	30	399	6.06061
2017-10-10	Rockwool	17 mM	6.3.2	158	149	11	0	0	0	13.5455
2017-10-10	Rockwool	17 mM	6.3.3	132	125	9	2	23	18.1818	13.8889
2017-10-10	Rockwool	17 mM	6.4.1	107	100	9	0	0	0	11.1111	6.4	27	311	0
2017-10-10	Rockwool	17 mM	6.4.2	104	96	9	0	0	0	10.6667
2017-10-10	Rockwool	17 mM	6.4.3	121	115	9	0	0	0	12.7778
2017-10-10	Coco peat	34 mM	7.1.1	77	70	7	1	10	12.5	10	7.1	34	399	4.16667
2017-10-10	Coco peat	34 mM	7.1.2	230	219	17	0	0	0	12.8824
2017-10-10	Coco peat	34 mM	7.1.3	116	110	10	0	0	0	11
2017-10-10	Coco peat	34 mM	7.2.1	152	146	9	0	0	0	16.2222	7.2	30	402	0
2017-10-10	Coco peat	34 mM	7.2.2	139	136	10	0	0	0	13.6
2017-10-10	Coco peat	34 mM	7.2.3	128	120	11	0	0	0	10.9091
2017-10-10	Coco peat	34 mM	7.3.1	110	102	8	1	10	11.1111	12.75	7.3	27	304	3.7037
2017-10-10	Coco peat	34 mM	7.3.2	97	92	9	0	0	0	10.2222
2017-10-10	Coco peat	34 mM	7.3.3	115	110	10	0	0	0	11
2017-10-10	Coco peat	34 mM	7.4.1	119	110	10	0	0	0	11	7.4	26	315	4.16667
2017-10-10	Coco peat	34 mM	7.4.2	82	78	7	1	12	12.5	11.1429
2017-10-10	Coco peat	34 mM	7.4.3	133	127	9	0	0	0	14.1111
2017-10-10	Perlite	34 mM	8.1.1	115	107	8	0	0	0	13.375	8.1	28	363	3.7037
2017-10-10	Perlite	34 mM	8.1.2	99	91	8	1	13	11.1111	11.375
2017-10-10	Perlite	34 mM	8.1.3	174	165	12	0	0	0	13.75
2017-10-10	Perlite	34 mM	8.2.1	145	136	10	0	0	0	13.6	8.2	29	365	0
2017-10-10	Perlite	34 mM	8.2.2	126	120	10	0	0	0	12
2017-10-10	Perlite	34 mM	8.2.3	117	109	9	0	0	0	12.1111
2017-10-10	Perlite	34 mM	8.3.1	167	158	11	0	0	0	14.3636	8.3	31	312	3.33333
2017-10-10	Perlite	34 mM	8.3.2	113	14	9	1	12	10	1.55556
2017-10-10	Perlite	34 mM	8.3.3	147	140	11	0	0	0	12.7273
2017-10-10	Perlite	34 mM	8.4.1	155	148	11	0	0	0	13.4545	8.4	33	436	2.5641
2017-10-10	Perlite	34 mM	8.4.2	152	145	10	0	0	0	14.5
2017-10-10	Perlite	34 mM	8.4.3	152	143	12	1	11	7.69231	11.9167
2017-10-10	Rockwool	34 mM	9.1.1	194	173	17	0	0	0	10.1765	9.1	37	435	0
2017-10-10	Rockwool	34 mM	9.1.2	133	125	10	0	0	0	12.5
2017-10-10	Rockwool	34 mM	9.1.3	144	137	10	0	0	0	13.7
2017-10-10	Rockwool	34 mM	9.2.1	140	131	11	0	0	0	11.9091	9.2	36	393	0
2017-10-10	Rockwool	34 mM	9.2.2	104	96	11	0	0	0	8.72727
2017-10-10	Rockwool	34 mM	9.2.3	174	166	14	0	0	0	11.8571
2017-10-10	Rockwool	34 mM	9.3.1	113	105	9	1	9	10	11.6667	9.3	31	337	3.33333
2017-10-10	Rockwool	34 mM	9.3.2	111	104	11	0	0	0	9.45455
2017-10-10	Rockwool	34 mM	9.3.3	137	128	11	0	0	0	11.6364
2017-10-10	Rockwool	34 mM	9.4.1	152	144	12	1	8	7.69231	12	9.4	33	395	5.89744
2017-10-10	Rockwool	34 mM	9.4.2	126	120	9	1	12	10	13.3333
2017-10-10	Rockwool	34 mM	9.4.3	141	131	12	0	0	0	10.9167
2017-10-17	Coco peat	Control	1.1.1	151	143	10	1	12	9.09091	14.3	1.1	26	378	3.0303
2017-10-17	Coco peat	Control	1.1.2	143	137	9	0	0	0	15.2222
2017-10-17	Coco peat	Control	1.1.3	106	98	7	0	0	0	14
2017-10-17	Coco peat	Control	1.2.1	135	128	7	0	0	0	18.2857	1.2	25	386	0
2017-10-17	Coco peat	Control	1.2.2	136	124	10	0	0	0	12.4
2017-10-17	Coco peat	Control	1.2.3	142	134	8	0	0	0	16.75
2017-10-17	Coco peat	Control	1.3.1	154	146	9	0	0	0	16.2222	1.3	27	446	3.7037
2017-10-17	Coco peat	Control	1.3.2	136	124	8	1	15	11.1111	15.5
2017-10-17	Coco peat	Control	1.3.3	185	176	10	0	0	0	17.6
2017-10-17	Coco peat	Control	1.4.1	151	143	10	0	0	0	14.3	1.4	29	456	3.7037
2017-10-17	Coco peat	Control	1.4.2	146	138	8	1	12	11.1111	17.25
2017-10-17	Coco peat	Control	1.4.3	184	175	11	0	0	0	15.9091
2017-10-17	Perlite	Control	2.1.1	198	187	12	0	0	0	15.5833	2.1	30	456	0
2017-10-17	Perlite	Control	2.1.2	123	118	9	0	0	0	13.1111
2017-10-17	Perlite	Control	2.1.3	160	151	9	0	0	0	16.7778
2017-10-17	Perlite	Control	2.2.1	128	120	7	0	0	0	17.1429	2.2	26	424	0
2017-10-17	Perlite	Control	2.2.2	144	135	9	0	0	0	15
2017-10-17	Perlite	Control	2.2.3	178	169	10	0	0	0	16.9
2017-10-17	Perlite	Control	2.3.1	94	87	5	0	0	0	17.4	2.3	24	405	3.0303
2017-10-17	Perlite	Control	2.3.2	184	171	10	1	17	9.09091	17.1
2017-10-17	Perlite	Control	2.3.3	156	147	9	0	0	0	16.3333
2017-10-17	Perlite	Control	2.4.1	142	134	8	0	0	0	16.75	2.4	20	340	0
2017-10-17	Perlite	Control	2.4.2	43	38	3	0	0	0	12.6667
2017-10-17	Perlite	Control	2.4.3	177	168	9	0	0	0	18.6667
2017-10-17	Rockwool	Control	3.1.1	169	151	10	0	0	0	15.1	3.1	29	449	0
2017-10-17	Rockwool	Control	3.1.2	179	171	10	0	0	0	17.1
2017-10-17	Rockwool	Control	3.1.3	138	127	9	0	0	0	14.1111
2017-10-17	Rockwool	Control	3.2.1	150	140	10	0	0	0	14	3.2	26	380	0
2017-10-17	Rockwool	Control	3.2.2	142	133	9	0	0	0	14.7778
2017-10-17	Rockwool	Control	3.2.3	119	107	7	0	0	0	15.2857
2017-10-17	Rockwool	Control	3.3.1	149	139	9	0	0	0	15.4444	3.3	32	498	0
2017-10-17	Rockwool	Control	3.3.2	194	185	11	0	0	0	16.8182
2017-10-17	Rockwool	Control	3.3.3	186	174	12	0	0	0	14.5
2017-10-17	Rockwool	Control	3.4.1	164	158	11	0	0	0	14.3636	3.4	38	521	0
2017-10-17	Rockwool	Control	3.4.2	191	179	15	0	0	0	11.9333
2017-10-17	Rockwool	Control	3.4.3	194	184	12	0	0	0	15.3333
2017-10-17	Coco peat	17 mM	4.1.1	138	131	10	0	0	0	13.1	4.1	35	449	0
2017-10-17	Coco peat	17 mM	4.1.2	150	143	12	0	0	0	11.9167
2017-10-17	Coco peat	17 mM	4.1.3	183	175	13	0	0	0	13.4615
2017-10-17	Coco peat	17 mM	4.2.1	151	143	9	1	15	10	15.8889	4.2	29	415	3.33333
2017-10-17	Coco peat	17 mM	4.2.2	174	167	11	0	0	0	15.1818
2017-10-17	Coco peat	17 mM	4.2.3	111	105	9	0	0	0	11.6667
2017-10-17	Coco peat	17 mM	4.3.1	170	160	11	0	0	0	14.5455	4.3	29	403	0
2017-10-17	Coco peat	17 mM	4.3.2	113	107	8	0	0	0	13.375
2017-10-17	Coco peat	17 mM	4.3.3	143	136	10	0	0	0	13.6
2017-10-17	Coco peat	17 mM	4.4.1	86	80	6	0	0	0	13.3333	4.4	24	330	0
2017-10-17	Coco peat	17 mM	4.4.2	142	135	9	0	0	0	15
2017-10-17	Coco peat	17 mM	4.4.3	126	115	9	0	0	0	12.7778
2017-10-17	Perlite	17 mM	5.1.1	158	150	11	0	0	0	13.6364	5.1	27	366	0
2017-10-17	Perlite	17 mM	5.1.2	145	137	10	0	0	0	13.7
2017-10-17	Perlite	17 mM	5.1.3	85	79	6	0	0	0	13.1667
2017-10-17	Perlite	17 mM	5.2.1	160	151	11	0	0	0	13.7273	5.2	30	421	0
2017-10-17	Perlite	17 mM	5.2.2	154	145	10	0	0	0	14.5
2017-10-17	Perlite	17 mM	5.2.3	135	125	9	0	0	0	13.8889
2017-10-17	Perlite	17 mM	5.3.1	192	180	11	0	0	0	16.3636	5.3	27	389	0
2017-10-17	Perlite	17 mM	5.3.2	118	112	9	0	0	0	12.4444
2017-10-17	Perlite	17 mM	5.3.3	104	97	7	0	0	0	13.8571
2017-10-17	Perlite	17 mM	5.4.1	137	130	10	0	0	0	13	5.4	27	379	0
2017-10-17	Perlite	17 mM	5.4.2	132	121	8	0	0	0	15.125
2017-10-17	Perlite	17 mM	5.4.3	130	128	9	0	0	0	14.2222
2017-10-17	Rockwool	17 mM	6.1.1	66	60	5	0	0	0	12	6.1	17	232	0
2017-10-17	Rockwool	17 mM	6.1.2	32	27	2	0	0	0	13.5
2017-10-17	Rockwool	17 mM	6.1.3	152	145	10	0	0	0	14.5
2017-10-17	Rockwool	17 mM	6.2.1	138	128	9	0	0	0	14.2222	6.2	18	261	3.33333
2017-10-17	Rockwool	17 mM	6.2.2	157	133	9	1	14	10	14.7778
2017-10-17	Rockwool	17 mM	6.2.3						0
2017-10-17	Rockwool	17 mM	6.3.1	139	139	10	0	0	0	13.9	6.3	28	385	0
2017-10-17	Rockwool	17 mM	6.3.2	159	150	10	0	0	0	15
2017-10-17	Rockwool	17 mM	6.3.3	104	96	8	0	0	0	12
2017-10-17	Rockwool	17 mM	6.4.1	95	89	9	0	0	0	9.88889	6.4	32	410	0
2017-10-17	Rockwool	17 mM	6.4.2	173	164	11	0	0	0	14.9091
2017-10-17	Rockwool	17 mM	6.4.3	164	157	12	0	0	0	13.0833
2017-10-17	Coco peat	34 mM	7.1.1	102	97	8	0	0	0	12.125	7.1	24	294	4.16667
2017-10-17	Coco peat	34 mM	7.1.2	125	119	9	0	0	0	13.2222
2017-10-17	Coco peat	34 mM	7.1.3	82	78	7	1	11	12.5	11.1429
2017-10-17	Coco peat	34 mM	7.2.1	138	132	10	0	0	0	13.2	7.2	28	356	0
2017-10-17	Coco peat	34 mM	7.2.2	130	123	10	0	0	0	12.3
2017-10-17	Coco peat	34 mM	7.2.3	107	101	8	0	0	0	12.625
2017-10-17	Coco peat	34 mM	7.3.1	110	102	10	0	0	0	10.2	7.3	27	321	3.33333
2017-10-17	Coco peat	34 mM	7.3.2	100	93	8	0	0	0	11.625
2017-10-17	Coco peat	34 mM	7.3.3	134	126	9	1	13	10	14
2017-10-17	Coco peat	34 mM	7.4.1	112	107	7	0	0	0	15.2857	7.4	23	303	0
2017-10-17	Coco peat	34 mM	7.4.2	105	100	8	0	0	0	12.5
2017-10-17	Coco peat	34 mM	7.4.3	100	96	8	0	0	0	12
2017-10-17	Perlite	34 mM	8.1.1	123	117	8	0	0	0	14.625	8.1	19	261	0
2017-10-17	Perlite	34 mM	8.1.2	153	144	11	0	0	0	13.0909
2017-10-17	Perlite	34 mM	8.1.3						0
2017-10-17	Perlite	34 mM	8.2.1	103	96	9	0	0	0	10.6667	8.2	32	360	0
2017-10-17	Perlite	34 mM	8.2.2	159	144	11	0	0	0	13.0909
2017-10-17	Perlite	34 mM	8.2.3	129	120	12	0	0	0	10
2017-10-17	Perlite	34 mM	8.3.1	178	166	11	0	0	0	15.0909	8.3	29	434	0
2017-10-17	Perlite	34 mM	8.3.2	144	129	8	0	0	0	16.125
2017-10-17	Perlite	34 mM	8.3.3	145	139	10	0	0	0	13.9
2017-10-17	Perlite	34 mM	8.4.1	111	104	8	0	0	0	13	8.4	27	389	0
2017-10-17	Perlite	34 mM	8.4.2	137	119	8	0	0	0	14.875
2017-10-17	Perlite	34 mM	8.4.3	175	166	11	0	0	0	15.0909
2017-10-17	Rockwool	34 mM	9.1.1	123	114	11	0	0	0	10.3636	9.1	34	397	0
2017-10-17	Rockwool	34 mM	9.1.2	152	144	11	0	0	0	13.0909
2017-10-17	Rockwool	34 mM	9.1.3	150	139	12	0	0	0	11.5833
2017-10-17	Rockwool	34 mM	9.2.1	174	167	12	0	0	0	13.9167	9.2	38	431	0
2017-10-17	Rockwool	34 mM	9.2.2	105	97	11	0	0	0	8.81818
2017-10-17	Rockwool	34 mM	9.2.3	176	167	15	0	0	0	11.1333
2017-10-17	Rockwool	34 mM	9.3.1	158	149	10	0	0	0	14.9	9.3	29	370	0
2017-10-17	Rockwool	34 mM	9.3.2	90	82	8	0	0	0	10.25
2017-10-17	Rockwool	34 mM	9.3.3	148	139	11	0	0	0	12.6364
2017-10-17	Rockwool	34 mM	9.4.1	125	119	11	0	0	0	10.8182	9.4	32	378	0
2017-10-17	Rockwool	34 mM	9.4.2	128	119	11	0	0	0	10.8182
2017-10-17	Rockwool	34 mM	9.4.3	150	140	10	0	0	0	14
Empty fields in columns E to K mean that data are not available because there was no thruss at the time of harvest.

## Sheet: Raw data for Fig 3
Supplementary File S1: Raw data for Figure 3 and Fig 7A; analysis of TSS, dry matter, pH, TA and EC in fruits.
Date	Substrate	Salinity	Sample	Density	nD	TSS	Dry matter	pH	TA	EC
			No.	g/ml		°Brix	% (w/w)		mmoleq L-1	mS cm-1
2017-09-04	Coco peat	Control	1.1	1.02709	1.3458	8.6	8.49927	4.37	72.0795	7.26
2017-09-04	Coco peat	Control	1.2	1.02531	1.3443	7.8	7.72846	4.3	72.2122	7.16
2017-09-04	Coco peat	Control	1.3	1.02459	1.3445	7.9	8.11061	4.36	66.106	6.81
2017-09-04	Coco peat	Control	1.4	1.02399	1.3438	7.4	7.83589	4.31	63.4512	6.52
2017-09-04	Perlite	Control	2.1	1.02547	1.3445	7.9	7.69477	4.33	63.5839	6.93
2017-09-04	Perlite	Control	2.2	1.02271	1.3445	7.9	7.76201	4.22	67.4335	6.34
2017-09-04	Perlite	Control	2.3	1.0223	1.3434	7.1	6.91542	4.27	67.6459	6.47
2017-09-04	Perlite	Control	2.4	n.a	n.a	n.a	n.a	n.a	n.a	n.a
2017-09-04	Rockwool	Control	3.1	1.02323	1.3434	7.1	7.41901	4.31	63.1857	6.42
2017-09-04	Rockwool	Control	3.2	1.02028	1.3423	6.45	6.72379	4.23	62.0706	5.65
2017-09-04	Rockwool	Control	3.3	1.02268	1.3434	7.1	7.34885	4.25	69.5574	6.44
2017-09-04	Rockwool	Control	3.4	1.02267	1.3431	6.95	7.02657	4.3	70.0883	6.64
2017-09-04	Coco peat	17 mM	4.1	1.02655	1.3452	8.4	7.45095	4.24	75.929	7.2
2017-09-04	Coco peat	17 mM	4.2	1.02753	1.3455	8.5	8.40671	4.39	62.2565	7.24
2017-09-04	Coco peat	17 mM	4.3	1.03062	1.346	8.95	8.92603	4.41	67.8317	7.56
2017-09-04	Coco peat	17 mM	4.4	1.02855	1.3455	8.5	8.49325	4.36	68.4954	7.28
2017-09-04	Perlite	17 mM	5.1	1.02673	1.3442	7.55	8.41095	4.26	64.2476	6.7
2017-09-04	Perlite	17 mM	5.2	1.02619	1.345	8.1	8.51899	4.21	72.8759	6.97
2017-09-04	Perlite	17 mM	5.3	1.0269	1.3443	7.75	8.05693	4.33	66.7697	6.96
2017-09-04	Perlite	17 mM	5.4	1.02561	1.3442	7.7	8.11796	4.23	71.0175	6.58
2017-09-04	Rockwool	17 mM	6.1	1.03067	1.3461	8.95	9.10232	4.2	79.1149	6.93
2017-09-04	Rockwool	17 mM	6.2	1.02209	1.343	6.9	7.45563	4.1	80.575	6.55
2017-09-04	Rockwool	17 mM	6.3	1.02251	1.3433	7.05	7.64177	4.18	72.6104	6.2
2017-09-04	Rockwool	17 mM	6.4	1.02294	1.3439	7.3	7.26681	4.14	79.1149	6.58
2017-09-04	Coco peat	34 mM	7.1	1.03124	1.347	9.5	9.74473	4.25	74.4688	7.47
2017-09-04	Coco peat	34 mM	7.2	1.0291	1.346	8.95	9.05715	4.28	67.9644	7.19
2017-09-04	Coco peat	34 mM	7.3	1.03222	1.3472	9.55	10.214	4.31	73.8051	7.56
2017-09-04	Coco peat	34 mM	7.4	1.03137	1.3469	9.45	9.89129	4.19	77.1237	7.16
2017-09-04	Perlite	34 mM	8.1	1.02854	1.3458	8.55	8.79313	4.29	63.6636	7.05
2017-09-04	Perlite	34 mM	8.2	1.02315	1.3441	7.55	8.2812	4.09	78.0529	6.78
2017-09-04	Perlite	34 mM	8.3	1.02677	1.3451	8.15	8.77299	4.19	75.398	6.84
2017-09-04	Perlite	34 mM	8.4	n.a	n.a	n.a	n.a	n.a	n.a	n.a
2017-09-04	Rockwool	34 mM	9.1	1.02843	1.3453	8.5	8.89591	4.09	89.6016	7.03
2017-09-04	Rockwool	34 mM	9.2	1.02633	1.345	8.2	8.38521	4.14	81.5042	7.12
2017-09-04	Rockwool	34 mM	9.3	1.02421	1.344	7.5	8.16556	4.13	81.2918	6.85
2017-09-04	Rockwool	34 mM	9.4	n.a	n.a	n.a	n.a	n.a	n.a	n.a
2017-09-11	Coco peat	Control	1.1	1.02238	1.3446	7.8	8.14976	4.35	71.8269	6.74
2017-09-11	Coco peat	Control	1.2	1.02509	1.3432	7.1	7.27262	4.3	74.6187	6.62
2017-09-11	Coco peat	Control	1.3	1.02429	1.343	6.9	7.34982	4.31	72.5883	6.58
2017-09-11	Coco peat	Control	1.4	1.02448	1.3439	7.4	7.63365	4.32	75.3802	6.88
2017-09-11	Perlite	Control	2.1	1.02426	1.344	7.5	7.66347	4.35	71.0655	6.62
2017-09-11	Perlite	Control	2.2	1.02408	1.3432	7.1	7.29255	4.3	70.101	6.4
2017-09-11	Perlite	Control	2.3	1.02076	1.3427	6.5	6.87619	4.23	76.6492	6.21
2017-09-11	Perlite	Control	2.4	1.02258	1.343	6.8	7.20986	4.2	72.3853	5.91
2017-09-11	Rockwool	Control	3.1	1.02358	1.3432	7.1	7.51275	4.32	71.8269	6.25
2017-09-11	Rockwool	Control	3.2	1.02315	1.343	6.8	7.23852	4.34	67.0046	5.95
2017-09-11	Rockwool	Control	3.3	1.02246	1.343	6.8	6.93178	4.36	67.6391	6.28
2017-09-11	Rockwool	Control	3.4	1.02351	1.343	6.8	7.06903	4.34	71.3193	6.49
2017-09-11	Coco peat	17 mM	4.1	1.02948	1.3451	8.3	8.46739	4.29	81.0908	7.04
2017-09-11	Coco peat	17 mM	4.2	1.02689	1.3449	8	8.38895	4.29	79.9487	7.01
2017-09-11	Coco peat	17 mM	4.3	1.02826	1.3458	8.55	8.57286	4.38	79.1872	7.78
2017-09-11	Coco peat	17 mM	4.4	1.02791	1.3459	8.6	8.77024	4.36	75.8878	7.29
2017-09-11	Perlite	17 mM	5.1	1.02653	1.345	8.1	8.38471	4.34	68.6543	6.67
2017-09-11	Perlite	17 mM	5.2	1.02636	1.3443	7.75	8.13157	4.31	68.9081	6.72
2017-09-11	Perlite	17 mM	5.3	1.02867	1.3448	7.95	8.09851	4.34	72.3345	6.92
2017-09-11	Perlite	17 mM	5.4	1.02636	1.3443	7.75	8.26397	4.29	68.0198	6.35
2017-09-11	Rockwool	17 mM	6.1	1.02838	1.3449	8	8.41744	4.28	78.172	6.74
2017-09-11	Rockwool	17 mM	6.2	1.02497	1.3442	7.6	8.06142	4.3	73.3497	6.6
2017-09-11	Rockwool	17 mM	6.3	1.02543	1.3442	7.6	7.78303	4.27	71.0655	6.33
2017-09-11	Rockwool	17 mM	6.4	1.02606	1.3441	7.55	8.07749	4.28	73.6035	6.59
2017-09-11	Coco peat	34 mM	7.1	1.02973	1.3464	9.1	9.64646	4.31	80.0756	7.44
2017-09-11	Coco peat	34 mM	7.2	1.02785	1.3455	8.5	8.5992	4.3	74.3649	7.05
2017-09-11	Coco peat	34 mM	7.3	1.03126	1.3473	9.6	10.1302	4.33	80.2025	7.73
2017-09-11	Coco peat	34 mM	7.4	1.03279	1.3469	9.4	9.68384	4.2	83.8826	7.23
2017-09-11	Perlite	34 mM	8.1	1.03024	1.3449	8	8.63388	4.27	75.8116	6.86
2017-09-11	Perlite	34 mM	8.2	1.02716	1.3445	8.5	8.94853	4.23	79.9487	6.97
2017-09-11	Perlite	34 mM	8.3	1.02988	1.3452	8.4	9.03831	4.19	80.7101	6.9
2017-09-11	Perlite	34 mM	8.4	n.a	n.a	n.a	n.a	n.a	n.a	n.a
2017-09-11	Rockwool	34 mM	9.1	n.a	n.a	n.a	n.a	n.a	n.a	n.a
2017-09-11	Rockwool	34 mM	9.2	1.02657	1.3442	7.6	7.95183	4.25	76.5984	6.82
2017-09-11	Rockwool	34 mM	9.3	n.a	n.a	n.a	n.a	n.a	n.a	n.a
2017-09-11	Rockwool	34 mM	9.4	1.02335	1.3449	8	8.08127	4.21	80.0756	6.98
2017-09-18	Coco peat	Control	1.1	1.02632	1.3448	7.95	8.18281	4.3	71.8709	6.9
2017-09-18	Coco peat	Control	1.2	1.02375	1.3441	7.55	8.24298	4.4	65.0518	7.25
2017-09-18	Coco peat	Control	1.3	1.02668	1.345	8.05	7.86119	4.33	73.588	6.91
2017-09-18	Coco peat	Control	1.4	1.0238	1.3435	7.15	7.65247	4.34	69.7859	6.81
2017-09-18	Perlite	Control	2.1	1.02435	1.34405	7.5	7.66855	4.33	71.7483	6.93
2017-09-18	Perlite	Control	2.2	1.02346	1.3439	7.4	7.64654	4.29	74.2012	6.75
2017-09-18	Perlite	Control	2.3	1.02337	1.3437	7.2	7.64161	4.32	67.333	6.38
2017-09-18	Perlite	Control	2.4	1.0226	1.3432	7.1	7.68595	4.21	67.9462	5.93
2017-09-18	Rockwool	Control	3.1	1.02371	1.3431	7	7.32089	4.32	65.248	6.36
2017-09-18	Rockwool	Control	3.2	1.02396	1.3441	7.5	7.7434	4.36	60.9554	6.19
2017-09-18	Rockwool	Control	3.3	1.0226	1.3439	7.45	7.50536	4.4	63.2856	6.49
2017-09-18	Rockwool	Control	3.4	1.02439	1.3439	7.4	7.39609	4.39	68.4123	6.88
2017-09-18	Coco peat	17 mM	4.1	1.02835	1.3456	8.5	8.50362	4.27	75.7956	7.22
2017-09-18	Coco peat	17 mM	4.2	1.02845	1.3451	8.2	8.70228	4.44	63.8989	7.49
2017-09-18	Coco peat	17 mM	4.3	1.02626	1.3449	8	8.60123	4.34	72.9011	7.2
2017-09-18	Coco peat	17 mM	4.4	1.02768	1.3451	8.4	8.61453	4.34	68.4368	7.1
2017-09-18	Perlite	17 mM	5.1	1.02719	1.3449	8	8.63192	4.31	69.1727	7.1
2017-09-18	Perlite	17 mM	5.2	1.02612	1.3455	8.1	8.38819	4.34	71.3803	7.05
2017-09-18	Perlite	17 mM	5.3	1.02472	1.3441	7.5	8.07182	4.31	69.3934	6.72
2017-09-18	Perlite	17 mM	5.4	1.02809	1.3442	7.7	8.10319	4.3	69.9086	6.57
2017-09-18	Rockwool	17 mM	6.1	1.02818	1.3452	8.4	9.06893	4.32	68.0689	6.94
2017-09-18	Rockwool	17 mM	6.2	1.02305	1.34405	7.5	7.99003	4.34	69.418	6.91
2017-09-18	Rockwool	17 mM	6.3	1.02599	1.3448	7.95	8.19711	4.31	70.3501	6.65
2017-09-18	Rockwool	17 mM	6.4	1.02536	1.3444	7.75	8.68965	4.3	68.3142	6.76
2017-09-18	Coco peat	34 mM	7.1	1.03274	1.3468	9.25	10.1755	4.26	84.1356	7.78
2017-09-18	Coco peat	34 mM	7.2	1.02981	1.3456	8.5	9.1951	4.31	73.588	7.4
2017-09-18	Coco peat	34 mM	7.3	1.03289	1.3478	9.9	10.2533	4.28	82.9091	7.82
2017-09-18	Coco peat	34 mM	7.4	1.03103	1.3458	8.6	9.34552	4.19	80.4562	7.02
2017-09-18	Perlite	34 mM	8.1	1.02802	1.3451	8.1	9.16905	4.21	77.5126	7.12
2017-09-18	Perlite	34 mM	8.2	1.02892	1.345	8.05	9.09824	4.13	88.5508	7.3
2017-09-18	Perlite	34 mM	8.3	1.02467	1.3451	8.1	8.7418	4.24	73.4653	6.57
2017-09-18	Perlite	34 mM	8.4	1.02509	1.3452	8.25	8.62598	4.15	87.0791	6.95
2017-09-18	Rockwool	34 mM	9.1	1.02873	1.345	8.05	8.61064	4.19	80.9468	7.02
2017-09-18	Rockwool	34 mM	9.2	1.02609	1.3442	7.7	8.36612	4.2	83.1544	7.33
2017-09-18	Rockwool	34 mM	9.3	n.a	n.a	n.a	n.a	n.a	n.a	n.a
2017-09-18	Rockwool	34 mM	9.4	1.02555	1.3449	8	8.50225	4.17	83.8903	6.98
2017-10-10	Coco peat	Control	1.1	1.03002	1.3454	8.45	8.62495	4.43	81.2177	7.48
2017-10-10	Coco peat	Control	1.2	1.02699	1.3448	7.95	8.41975	4.31	107.867	7.68
2017-10-10	Coco peat	Control	1.3	1.02697	1.3449	8	8.34853	4.33	113.197	8.01
2017-10-10	Coco peat	Control	1.4	1.02619	1.345	8.05	8.45736	4.44	79.9487	7.62
2017-10-10	Perlite	Control	2.1	1.02897	1.3452	8.3	8.66302	4.5	81.4715	7.36
2017-10-10	Perlite	Control	2.2	1.02977	1.3451	8.1	8.53463	4.48	86.5476	7.16
2017-10-10	Perlite	Control	2.3	1.02588	1.349	8	8.28574	4.38	90.1009	7.2
2017-10-10	Perlite	Control	2.4	1.02504	1.344	7.5	8.08412	4.35	90.8623	7.36
2017-10-10	Rockwool	Control	3.1	1.02982	1.3455	8.5	8.30804	4.46	84.771	7.38
2017-10-10	Rockwool	Control	3.2	1.0273	1.3446	7.8	8.11162	4.32	97.715	7.11
2017-10-10	Rockwool	Control	3.3	1.02858	1.34515	8.2	8.51521	4.35	94.4156	7.58
2017-10-10	Rockwool	Control	3.4	1.02767	1.3452	8.4	8.13175	4.42	88.3242	7.78
2017-10-10	Coco peat	17 mM	4.1	1.03234	1.346	8.75	9.22271	4.29	98.2226	7.84
2017-10-10	Coco peat	17 mM	4.2	1.03101	1.3464	9.05	9.48651	4.34	101.268	8.29
2017-10-10	Coco peat	17 mM	4.3	1.02954	1.3461	8.95	9.25094	4.36	96.5729	8.6
2017-10-10	Coco peat	17 mM	4.4	1.02959	1.3461	8.95	8.94333	4.32	94.0348	8.08
2017-10-10	Perlite	17 mM	5.1	1.02945	1.3456	8.5	8.66672	4.35	89.8471	7.68
2017-10-10	Perlite	17 mM	5.2	1.0307	1.3459	8.7	8.67279	4.38	81.9791	7.51
2017-10-10	Perlite	17 mM	5.3	1.0296	1.34585	8.65	8.73001	4.4	83.2481	7.87
2017-10-10	Perlite	17 mM	5.4	1.03019	1.3459	8.7	8.88098	4.33	91.8775	7.75
2017-10-10	Rockwool	17 mM	6.1	1.03102	1.3462	9	8.7482	4.35	84.0095	7.26
2017-10-10	Rockwool	17 mM	6.2	1.03328	1.346	8.75	8.93375	4.32	99.9993	7.73
2017-10-10	Rockwool	17 mM	6.3	1.03022	1.3465	9.1	9.25333	4.32	95.177	7.9
2017-10-10	Rockwool	17 mM	6.4	1.02917	1.3459	8.7	8.83988	4.3	93.9079	7.71
2017-10-10	Coco peat	34 mM	7.1	1.03423	1.34785	10	9.9903	4.21	101.776	8.13
2017-10-10	Coco peat	34 mM	7.2	1.03375	1.3469	9.4	9.60677	4.26	99.2379	8.64
2017-10-10	Coco peat	34 mM	7.3	1.03381	1.34785	10	10.4606	4.18	108.375	8.42
2017-10-10	Coco peat	34 mM	7.4	1.03258	1.347	9.5	9.89847	4.17	109.263	8.45
2017-10-10	Perlite	34 mM	8.1	1.03152	1.3465	9.1	9.17918	4.24	101.522	7.91
2017-10-10	Perlite	34 mM	8.2	1.03321	1.34685	9.35	9.4951	4.26	93.9587	7.85
2017-10-10	Perlite	34 mM	8.3	1.02828	1.3485	8.6	8.91511	4.22	101.268	7.93
2017-10-10	Perlite	34 mM	8.4	1.0316	1.3468	9.35	9.28081	4.27	88.4511	7.88
2017-10-10	Rockwool	34 mM	9.1	1.02902	1.3459	8.7	8.90545	4.33	77.6644	7.09
2017-10-10	Rockwool	34 mM	9.2	1.02901	1.3462	9	9.1635	4.32	82.9943	7.38
2017-10-10	Rockwool	34 mM	9.3	1.03135	1.347	9.5	9.70164	4.26	99.7455	8.27
2017-10-10	Rockwool	34 mM	9.4	1.03323	1.3468	9.35	9.7977	4.29	89.3394	8.09
2017-10-17	Coco peat	Control	1.1	1.02709	1.3444	7.75	8.66621	4.36	85.3304	7.13
2017-10-17	Coco peat	Control	1.2	1.0291	1.3439	7.4	8.39314	4.32	89.3428	7.33
2017-10-17	Coco peat	Control	1.3	1.02615	1.3442	7.6	8.32352	4.32	100.845	7.24
2017-10-17	Coco peat	Control	1.4	1.02509	1.3443	7.65	8.58867	4.42	83.3242	6.92
2017-10-17	Perlite	Control	2.1	1.02731	1.3438	7.35	8.36045	4.38	85.5978	7.03
2017-10-17	Perlite	Control	2.2	1.02455	1.3439	7.4	8.06783	4.31	88.8078	6.61
2017-10-17	Perlite	Control	2.3	1.02768	1.3443	7.65	7.94793	4.38	88.2728	7.08
2017-10-17	Perlite	Control	2.4	1.02777	1.3437	7.3	8.02034	4.38	83.3242	6.65
2017-10-17	Rockwool	Control	3.1	1.02572	1.345	8.05	8.74924	4.43	80.5155	6.81
2017-10-17	Rockwool	Control	3.2	1.02824	1.4495	8	8.66068	4.35	89.0753	6.64
2017-10-17	Rockwool	Control	3.3	1.02909	1.344	7.5	8.49154	4.38	93.3552	6.79
2017-10-17	Rockwool	Control	3.4	1.02952	1.345	8.05	8.39137	4.45	90.4127	7.14
2017-10-17	Coco peat	17 mM	4.1	1.02776	1.34522	8	9.1767	4.26	94.6926	7.39
2017-10-17	Coco peat	17 mM	4.2	1.03324	1.3462	7.5	9.87003	4.34	91.4827	7.67
2017-10-17	Coco peat	17 mM	4.3	1.03173	1.3455	8.05	9.64756	4.34	89.3428	7.12
2017-10-17	Coco peat	17 mM	4.4	1.0333	1.3458	8.6	9.497	4.38	92.8202	7.53
2017-10-17	Perlite	17 mM	5.1	1.02455	1.344	7.5	8.23237	4.31	90.9477	7.28
2017-10-17	Perlite	17 mM	5.2	1.02805	1.3451	8.2	8.97366	4.33	80.783	6.78
2017-10-17	Perlite	17 mM	5.3	1.02507	1.3445	7.8	8.54267	4.34	90.1452	6.8
2017-10-17	Perlite	17 mM	5.4	1.02489	1.3444	7.7	8.354	4.33	89.6102	6.78
2017-10-17	Rockwool	17 mM	6.1	1.02572	1.3448	7.9	8.67038	4.31	86.9353	6.87
2017-10-17	Rockwool	17 mM	6.2	1.03077	1.34505	8.1	9.16693	4.3	90.9477	6.96
2017-10-17	Rockwool	17 mM	6.3	1.027	1.3451	8.2	8.76047	4.38	89.6102	7.13
2017-10-17	Rockwool	17 mM	6.4	1.03137	1.34525	8.35	9.50459	4.37	89.744	7.15
2017-10-17	Coco peat	34 mM	7.1	1.03102	1.3464	9.2	10.2277	4.25	97.3676	7.9
2017-10-17	Coco peat	34 mM	7.2	1.03415	1.3462	9	9.72708	4.18	94.9601	7.54
2017-10-17	Coco peat	34 mM	7.3	1.0336	1.3474	9.7	10.5236	4.24	100.31	7.51
2017-10-17	Coco peat	34 mM	7.4	1.0333	1.3465	9.25	10.0991	4.24	99.775	7.57
2017-10-17	Perlite	34 mM	8.1	1.03103	1.3455	8.5	9.13423	4.25	93.8901	7.18
2017-10-17	Perlite	34 mM	8.2	1.03296	1.3452	8.7	9.71437	4.22	91.2152	7.12
2017-10-17	Perlite	34 mM	8.3	1.03262	1.3457	8.55	9.11879	4.34	92.2852	7.31
2017-10-17	Perlite	34 mM	8.4	1.03369	1.3458	8.6	9.53196	4.29	86.4003	7.07
2017-10-17	Rockwool	34 mM	9.1	1.03159	1.346	8.9	10.002	4.32	97.3676	7.02
2017-10-17	Rockwool	34 mM	9.2	1.03584	1.3461	8.95	9.77789	4.23	86.4538	7.14
2017-10-17	Rockwool	34 mM	9.3	1.03212	1.3463	9.05	9.74137	4.27	96.0301	7.16
2017-10-17	Rockwool	34 mM	9.4	1.03589	1.3461	8.95	9.60879	4.32	90.6802	7.31
n.a.	not available since there were no ripe fruits at the time of the harvest

## Sheet: Raw data for Fig 4
Supplementary File S1: Raw data for Figure 4; analysis of sugars and organic acids in fruits.
Date	Substrate	Salinity	Sample	Fructose	Glucose	Citric Acid	Malic Acid
			No.	g kg-1 FW	g kg-1 FW	g kg-1 FW	g kg-1 FW
2017-10-10	Coco peat	Control	1.1	30.1178	26.3496	9.2873	0.201303
2017-10-10	Coco peat	Control	1.2	24.389	21.8792	17.426	0.183489
2017-10-10	Coco peat	Control	1.3	23.863	21.134	17.5659	0.161943
2017-10-10	Coco peat	Control	1.4	33.1965	29.111	10.9477	0.214821
2017-10-10	Perlite	Control	2.1	29.1111	25.444	8.19261	0.130178
2017-10-10	Perlite	Control	2.2	27.937	24.282	10.8256	0.117591
2017-10-10	Perlite	Control	2.3	25.9274	22.4853	10.2887	0.129648
2017-10-10	Perlite	Control	2.4	25.2957	22.1404	11.8915	0.131984
2017-10-10	Rockwool	Control	3.1	27.9769	24.1573	9.28185	0.122453
2017-10-10	Rockwool	Control	3.2	26.9446	23.965	11.3621	0.154371
2017-10-10	Rockwool	Control	3.3	26.7822	23.2678	11.873	0.139902
2017-10-10	Rockwool	Control	3.4	26.5544	22.8897	8.92804	0.146824
2017-10-10	Coco peat	17 mM	4.1	30.5595	27.1167	13.2214	0.117984
2017-10-10	Coco peat	17 mM	4.2	32.9498	28.991	16.9238	0.150803
2017-10-10	Coco peat	17 mM	4.3	29.2742	26.0838	12.606	0.161002
2017-10-10	Coco peat	17 mM	4.4	30.3983	27.3286	10.3489	0.10318
2017-10-10	Perlite	17 mM	5.1	28.725	25.4275	11.2305	0.117504
2017-10-10	Perlite	17 mM	5.2	28.0656	25.6637	8.50179	0.127714
2017-10-10	Perlite	17 mM	5.3	30.8542	27.331	8.78079	0.143816
2017-10-10	Perlite	17 mM	5.4	30.7043	27.4689	11.1402	0.124545
2017-10-10	Rockwool	17 mM	6.1	30.5098	27.2882	9.34977	0.092464
2017-10-10	Rockwool	17 mM	6.2	29.2883	26.629	13.2696	0.127783
2017-10-10	Rockwool	17 mM	6.3	31.6509	28.4487	11.3754	0.121942
2017-10-10	Rockwool	17 mM	6.4	34.6091	31.3098	14.9791	0.144011
2017-10-10	Coco peat	34 mM	7.1	33.7856	30.5183	12.5582	0.123536
2017-10-10	Coco peat	34 mM	7.2	30.7238	27.6871	12.013	0.112697
2017-10-10	Coco peat	34 mM	7.3	36.0248	32.7712	13.7407	0.111062
2017-10-10	Coco peat	34 mM	7.4	33.4301	30.5228	15.2642	0.122136
2017-10-10	Perlite	34 mM	8.1	30.1097	27.4839	12.0337	0.0969706
2017-10-10	Perlite	34 mM	8.2	33.3328	30.6085	11.6624	0.131873
2017-10-10	Perlite	34 mM	8.3	27.5364	25.4305	12.7719	0.106133
2017-10-10	Perlite	34 mM	8.4	31.7335	28.5636	8.64918	0.11723
2017-10-10	Rockwool	34 mM	9.1	31.7228	28.8835	7.10188	0.186726
2017-10-10	Rockwool	34 mM	9.2	33.9335	31.0113	8.71361	0.1731
2017-10-10	Rockwool	34 mM	9.3	32.1154	29.4287	12.0129	0.117708
2017-10-10	Rockwool	34 mM	9.4	35.5684	32.2973	10.9322	0.142469
2017-10-17	Coco peat	Control	1.1	25.6396	22.2322	13.4905	0.246328
2017-10-17	Coco peat	Control	1.2	24.1941	21.2608	14.4879	0.23704
2017-10-17	Coco peat	Control	1.3	24.0248	20.9038	17.3659	0.233064
2017-10-17	Coco peat	Control	1.4	25.3161	21.7479	12.1121	0.217669
2017-10-17	Perlite	Control	2.1	24.5391	21.0692	11.8532	0.167278
2017-10-17	Perlite	Control	2.2	24.4995	21.6952	10.6341	0.137372
2017-10-17	Perlite	Control	2.3	23.9829	21.0214	11.9663	0.19353
2017-10-17	Perlite	Control	2.4	22.5663	19.417	11.3271	0.164409
2017-10-17	Rockwool	Control	3.1	26.2129	22.8288	10.41	0.197729
2017-10-17	Rockwool	Control	3.2	25.7591	23.0436	11.5246	0.18626
2017-10-17	Rockwool	Control	3.3	25.2584	22.4515	14.2055	0.211606
2017-10-17	Rockwool	Control	3.4	24.8679	22.0543	13.3896	0.249414
2017-10-17	Coco peat	17 mM	4.1	27.7087	24.076	15.4664	0.172006
2017-10-17	Coco peat	17 mM	4.2	30.9127	26.6915	14.9834	0.242722
2017-10-17	Coco peat	17 mM	4.3	28.7343	24.9376	10.7727	0.18708
2017-10-17	Coco peat	17 mM	4.4	30.7472	27.1226	15.4121	0.198765
2017-10-17	Perlite	17 mM	5.1	23.6665	21.4091	16.0384	0.19923
2017-10-17	Perlite	17 mM	5.2	27.9988	25.3562	9.43688	0.183707
2017-10-17	Perlite	17 mM	5.3	24.2988	22.0011	12.6959	0.174639
2017-10-17	Perlite	17 mM	5.4	24.9455	22.9206	13.2331	0.181767
2017-10-17	Rockwool	17 mM	6.1	26.5581	23.9638	14.9629	0.204037
2017-10-17	Rockwool	17 mM	6.2	27.283	24.7773	14.1521	0.241779
2017-10-17	Rockwool	17 mM	6.3	25.8333	23.6953	13.965	0.190896
2017-10-17	Rockwool	17 mM	6.4	26.7288	24.686	13.5684	0.202094
2017-10-17	Coco peat	34 mM	7.1	31.1914	27.5958	13.2079	0.138045
2017-10-17	Coco peat	34 mM	7.2	30.1928	26.8036	13.2954	0.240529
2017-10-17	Coco peat	34 mM	7.3	32.1395	29.4313	13.0326	0.181626
2017-10-17	Coco peat	34 mM	7.4	30.0011	27.8922	16.0874	0.19317
2017-10-17	Perlite	34 mM	8.1	27.4411	25.4783	14.1546	0.211375
2017-10-17	Perlite	34 mM	8.2	27.5129	25.7069	10.5204	0.241695
2017-10-17	Perlite	34 mM	8.3	26.1504	24.1184	11.5192	0.15275
2017-10-17	Perlite	34 mM	8.4	23.988	22.2063	10.6197	0.186922
2017-10-17	Rockwool	34 mM	9.1	28.6142	26.6433	14.3683	0.203974
2017-10-17	Rockwool	34 mM	9.2	29.5752	27.3881	15.4111	0.223148
2017-10-17	Rockwool	34 mM	9.3	28.766	26.8368	12.4528	0.1779
2017-10-17	Rockwool	34 mM	9.4	24.5899	22.9985	10.4821	0.161311

## Sheet: Raw data for Fig 5
Supplementary File S1: Raw data for Fig 5; analysis of amino acids in fruits.
Harvest date	Salinity	Substrate	Treatment	Sample	Density	Asp	Glu	Asn	His	Ser	Gln	Arg	Gly	Thr	Pro	Ala	GABA	Val	Met	Ile	Leu	NH3	Phe	Orn	Lys	Tyr
			No.	No.	g mL-1	mg kg-1 FW	mg kg-1 FW	mg kg-1 FW	mg kg-1 FW	mg kg-1 FW	mg kg-1 FW	mg kg-1 FW	mg kg-1 FW	mg kg-1 FW	mg kg-1 FW	mg kg-1 FW	mg kg-1 FW	mg kg-1 FW	mg kg-1 FW	mg kg-1 FW	mg kg-1 FW	mg kg-1 FW	mg kg-1 FW	mg kg-1 FW	mg kg-1 FW	mg kg-1 FW
2017-09-11	Control	Coco peat	11	1.1	1.03002	1031.64	4515.9	206.53	48.3082	76.7575	877.293	86.5427	13.8332	55.1887	149.076	91.0954	609.157	17.2838	16.5216	39.7075	49.8532	8.3638	189.319	2.54416	68.404	24.1541
2017-09-11	Control	Coco peat	11	1.2	1.02699	777.561	3624.11	194.634	46.6251	48.1964	1025.79	77.753	9.03747	38.0806	79.1292	35.0613	374.706	13.1659	13.6794	21.5564	34.1062	16.4112	146.356	10.0234	66.0968	32.5041
2017-09-11	Control	Coco peat	11	1.3	1.02697	727.177	3129.27	236.285	38.9222	34.804	1255.17	64.1035	7.71254	40.7296	47.7028	31.4972	360.908	11.9129	10.7626	20.1286	31.7539	19.153	118.245	8.73951	61.8544	29.7616
2017-09-11	Control	Coco peat	11	1.4	1.02619	954.443	4585.14	165.269	46.0659	59.1396	896.166	85.913	11.6781	41.8174	58.3392	55.8455	550.502	16.7783	15.5161	25.4804	38.5439	9.50257	184.192	3.74561	60.0632	22.566
2017-09-11	17 mM	Coco peat	12	4.1	1.03234	680.25	3533.35	170.656	44.3184	49.9549	775.607	75.5879	9.03298	35.5538	70.8908	41.3968	339.919	12.8526	13.3894	21.1526	33.1897	13.6992	116.623	2.47762	54.2495	20.3268
2017-09-11	17 mM	Coco peat	12	4.2	1.03101	678.405	3442.25	134.97	36.6524	42.3023	664.321	61.2214	9.45436	30.8787	135.289	41.7868	352.915	13.1969	13.8568	18.5479	33.0336	12.1865	128.887	2.4538	45.0758	20.0738
2017-09-11	17 mM	Coco peat	12	4.3	1.02954	764.258	3903.66	165.931	45.0012	57.7469	803.35	9.92477	9.95565	37.1664	115.35	51.3946	425.396	15.5872	15.1754	28.683	39.3696	13.5899	143.641	4.22111	50.8799	19.5407
2017-09-11	17 mM	Coco peat	12	4.4	1.02959	753.732	3844.57	160.987	39.0729	48.6996	804.872	3.60357	10.1003	37.6624	139.551	41.2866	416.201	14.857	13.7244	20.983	35.4385	13.3538	146.264	3.84037	50.7485	20.6124
2017-09-11	34 mM	Coco peat	13	7.1	1.03423	623.506	3485.06	147.398	36.1153	46.3335	623.258	5.32628	7.33269	33.3332	237.738	40.8728	274.795	9.65971	10.7456	16.7545	25.349	10.7146	116.206	0.5378	47.0368	17.3647
2017-09-11	34 mM	Coco peat	13	7.2	1.03375	637.751	3561.11	157.006	29.1621	47.9867	703.219	66.0359	9.88265	32.6148	186.085	51.4911	359.518	16.9121	13.3974	21.7708	34.6306	13.7282	113.299	2.40864	51.3567	20.5613
2017-09-11	34 mM	Coco peat	13	7.3	1.03381	655.322	3520.04	176.234	46.0459	44.7846	881.83	55.5363	8.13608	35.9456	287.792	40.0395	330.106	13.2845	17.9883	21.9685	31.4899	17.5438	130.487	2.23303	52.3004	19.5183
2017-09-11	34 mM	Coco peat	13	7.4	1.03258	646.922	3495.38	200.475	47.8394	49.0166	947.919	63.6276	9.62365	38.3294	223.192	40.1364	363.685	11.9883	9.74756	17.8327	30.4198	22.1075	115.866	2.46787	55.749	22.5825
2017-09-11	Control	Perlite	21	2.1	1.02897	968.945	4410.43	169.524	45.0074	54.8238	977.166	88.2037	10.619	42.7951	72.7794	51.3664	618.074	16.1446	20.9396	29.1097	41.797	11.2055	167.908	2.23288	58.8882	25.107
2017-09-11	Control	Perlite	21	2.2	1.02977	951.184	4342.27	176.018	41.6231	53.4551	1022.44	91.5976	10.4521	40.9641	73.2781	43.1677	516.427	15.57	16.4865	24.9615	42.7455	11.7393	166.74	1.99774	60.9415	26.1148
2017-09-11	Control	Perlite	21	2.3	1.02588	797.57	3704.99	191.091	50.2784	46.7288	1042.35	78.0284	8.31989	39.5887	45.1387	39.4656	416.846	12.8851	13.8802	21.8	33.6386	12.844	146.424	1.71322	57.9007	24.7237
2017-09-11	Control	Perlite	21	2.4	1.02504	654.15	3263.53	161.505	36.9322	37.537	903.962	6.3655	7.40079	31.4892	36.1839	34.2056	356.95	11.0294	12.3107	17.8459	29.3981	13.6843	108.254	1.48631	48.4126	20.0703
2017-09-11	17 mM	Perlite	22	5.1	1.02945	734.008	3467.14	167.142	49.6092	52.7387	813.111	69.8585	9.77977	35.3616	71.6394	39.85	411.821	13.5373	14.3814	20.9493	34.4145	11.4578	128.177	2.15155	52.2446	23.4818
2017-09-11	17 mM	Perlite	22	5.2	1.0307	767.325	3496.72	143.473	37.1877	52.2977	748.422	74.9422	9.62674	35.9405	113.593	39.4758	499.508	13.7186	13.5846	21.6756	34.4357	8.59604	141.907	1.51513	48.7418	19.944
2017-09-11	17 mM	Perlite	22	5.3	1.0296	795.197	3821.41	143.783	56.4836	60.1078	754.909	70.2802	9.06044	34.9856	88.3804	41.5853	414.505	15.3924	20.561	26.6459	39.2276	12.5817	148.529	0.236807	41.122	19.83
2017-09-11	17 mM	Perlite	22	5.4	1.03019	716.435	3518.38	152.458	35.6137	43.7522	786.725	68.281	8.36514	34.192	80.4475	39.1781	358.599	14.2166	14.8347	20.1608	31.4517	11.8575	120.13	2.50336	50.8193	21.7576
2017-09-11	34 mM	Perlite	23	8.1	1.03152	619.871	3158.38	163.506	33.5038	41.3124	841.452	61.7777	8.345	34.8757	101.233	32.7301	335.688	15.2149	22.7141	23.0338	31.9462	16.9582	132.024	1.87737	49.0797	21.5485
2017-09-11	34 mM	Perlite	23	8.2	1.03321	692.392	3647.54	140.95	34.9637	57.9008	688.249	68.7081	8.44128	39.3548	223.017	45.0477	320.789	14.6095	17.2442	30.0973	36.0899	9.78445	164.114	3.01696	50.1414	19.1453
2017-09-11	34 mM	Perlite	23	8.3	1.02828	538.024	2797.2	132.432	31.5886	36.802	670.168	54.7659	6.33417	29.1824	85.8198	25.0488	254.508	8.23648	8.67864	21.676	28.5552	20.2262	114.231	1.90231	40.4729	17.275
2017-09-11	34 mM	Perlite	23	8.4	1.0316	781.815	4074.44	153.904	35.6932	62.5662	725.428	80.0208	9.92394	43.1826	197.416	58.1716	443.091	12.6783	13.3076	24.913	37.8183	12.2038	192.465	2.16635	54.8912	21.1167
2017-09-11	Control	Rockwool	31	3.1	1.02982	820.046	3746.37	163.978	40.3792	47.7219	981.346	78.7503	9.88627	38.1239	54.0347	39.5657	476.879	18.3514	20.4934	20.236	36.6513	11.2662	145.246	2.17292	49.4726	22.1823
2017-09-11	Control	Rockwool	31	3.2	1.0273	801.76	3381.64	208.163	32.1855	43.4036	1115.19	74.4077	7.5096	41.801	75.0754	30.624	328.399	13.3036	15.954	25.5593	35.9249	17.8648	159.972	3.18465	53.5842	22.0973
2017-09-11	Control	Rockwool	31	3.3	1.02858	792.548	3753.87	174.436	35.2596	45.0619	986.167	74.9728	9.1646	36.247	57.4459	37.975	379.75	12.7235	14.1943	26.0435	38.7053	15.3978	142.9	2.25258	51.9122	22.7418
2017-09-11	Control	Rockwool	31	3.4	1.02767	955.635	4427.31	187.335	36.4208	56.5941	1036.74	82.1729	11.0783	44.8477	71.1768	56.8818	510.23	16.5558	15.1788	24.9417	38.9181	10.8831	172.444	2.73362	54.1996	24.695
2017-09-11	17 mM	Rockwool	32	6.1	1.03102	645.127	3180.96	127.702	30.3222	37.8589	676.779	60.1391	8.55742	28.2395	58.9637	28.6725	334.946	11.5474	13.9599	18.4036	29.4561	11.4958	102.359	1.27846	41.1581	18.5995
2017-09-11	17 mM	Rockwool	32	6.2	1.03328	683.566	3406.39	148.823	35.3692	47.9132	752.682	9.0102	25.6667	13.6703	180.597	34.9559	307.886	11.9757	12.699	20.6243	32.755	10.2398	128.375	1.34326	49.9281	20.2213
2017-09-11	17 mM	Rockwool	32	6.3	1.03022	721.782	3671.29	150.072	34.2239	49.6772	751.339	69.6223	8.37569	36.5831	146.497	42.1669	383.901	12.4142	13.5165	21.4286	30.9787	10.6113	134.032	1.96772	48.1525	19.3681
2017-09-11	17 mM	Rockwool	32	6.4	1.02917	592.48	2900.25	122.965	26.676	31.1734	655.866	55.4308	7.42028	27.3346	84.9884	26.8097	292.622	9.97261	10.0858	14.7068	23.6296	14.82	95.4551	1.17325	39.0774	17.9486
2017-09-11	34 mM	Rockwool	33	9.1	1.02902	761.146	3413.27	151.523	34.8117	46.8822	642.386	70.4673	13.5831	39.6481	158.335	78.0306	287.055	11.9263	12.9348	33.1344	34.1738	10.2696	132.929	1.14221	50.6998	20.4569
2017-09-11	34 mM	Rockwool	33	9.2	1.02901	730.607	3597.15	154.887	39.2773	57.285	722.2	61.6891	8.61281	40.5636	201.943	56.8116	265.227	10.5474	11.1339	24.758	30.1809	9.12732	136.416	1.72874	47.7152	19.0881
2017-09-11	34 mM	Rockwool	33	9.3	1.03135	713.189	3651.71	153.826	40.5114	46.8645	748.43	47.4937	8.12704	37.634	283.353	43.6261	346.183	11.4583	11.2211	20.132	29.9298	13.7995	119.791	1.00041	46.3798	17.3886
2017-09-11	34 mM	Rockwool	33	9.4	1.03323	743.736	3657.6	177.26	37.2168	58.0259	813.737	55.9491	9.8363	44.501	289.406	68.7818	391.644	16.139	16.9346	25.9856	34.5924	8.72042	140.426	1.11588	50.628	21.5944
2017-10-17	Control	Coco peat	11	1.1	1.02709	772.296	3962.92	176.032	37.4783	60.6494	1424.24	73.4058	9.37729	45.9826	88.8942	90.6813	331.173	12.4072	13.65	26.9096	34.582	5.91601	131.6	3.62561	53.4803	5.19705
2017-10-17	Control	Coco peat	11	1.2	1.0291	819.812	4257.71	179.619	49.2219	50.9919	1609.3	64.2261	5.58801	37.5827	56.4564	51.8769	253.364	7.33748	16.7949	19.4397	25.4085	5.96878	127.053	1.30696	51.2801	3.12846
2017-10-17	Control	Coco peat	11	1.3	1.02615	817.37	4010.85	222.582	38.5217	50.62	1926.17	70.004	6.31082	42.4313	49.9017	48.2085	289.569	9.45084	12.5703	19.9073	26.7209	9.39953	127.766	3.18106	51.1433	6.45448
2017-10-17	Control	Coco peat	11	1.4	1.02509	727.623	3856.15	158.203	44.6634	49.2251	1468.75	65.1038	6.18132	36.5856	40.44	54.4633	234.039	8.96958	13.5415	18.5337	24.9611	4.43866	116.656	1.0866	46.0268	18.749
2017-10-17	17 mM	Coco peat	12	4.1	1.02776	633.809	3653.16	141.183	42.1484	60.2884	1236.57	62.8064	5.59101	36.4752	72.8887	60.9667	196.199	8.8079	11.6754	20.3291	27.6673	4.93325	113.002	1.82941	48.798	13.5562
2017-10-17	17 mM	Coco peat	12	4.2	1.03324	939.416	5288.2	172.325	44.2642	77.793	1341.05	86.307	9.62984	49.7197	173.058	109.803	259.417	14.2794	18.5984	27.3293	33.7664	5.0629	150.926	2.92408	55.4646	13.2669
2017-10-17	17 mM	Coco peat	12	4.3	1.03173	988.434	5620.26	226.794	62.0376	80.2063	1752.88	90.5236	8.66649	55.7854	110.064	94.31	296.9	16.0124	17.9211	33.3969	39.7936	5.79829	164.694	2.96105	70.5803	16.8687
2017-10-17	17 mM	Coco peat	12	4.4	1.0333	701.318	4025.25	145.25	27.9713	53.5143	1157.2	60.8611	6.43743	35.1734	110.676	64.4673	212.156	8.75201	14.3421	17.597	22.8048	5.69346	109.426	2.68657	43.3261	10.302
2017-10-17	34 mM	Coco peat	13	7.1	1.03102	707.699	4134.98	182.17	34.9823	68.8512	1346.37	62.9022	5.81492	39.7559	232.948	75.1094	271.796	11.3824	13.2382	22.9195	28.0952	6.56757	115.587	3.19615	56.6646	12.3516
2017-10-17	34 mM	Coco peat	13	7.2	1.03415	822.58	4566.42	177.346	31.3553	81.2528	1330.58	69.8048	6.81502	41.8105	235.537	72.7211	231.68	8.80057	14.7055	25.016	30.9209	5.5637	120.033	2.91629	52.183	12.9992
2017-10-17	34 mM	Coco peat	13	7.3	1.0336	959.321	5412.2	251.205	50.9459	91.3801	1942.93	70.9356	7.01811	53.4885	329.231	66.8426	312.466	9.59176	13.6951	27.4626	34.8735	8.8269	158.223	2.97675	61.4266	12.3825
2017-10-17	34 mM	Coco peat	13	7.4	1.0333	696.703	3962.79	173.946	32.2803	68.1875	1273.19	59.5284	5.60049	30.5237	262.024	56.5938	221.509	8.69005	9.47536	21.2756	24.7062	7.40876	119.945	3.92654	49.4331	13.0506
2017-10-17	Control	Perlite	21	2.1	1.02731	766.808	3773.15	154.21	37.6203	46.9688	1602.21	62.8922	6.1228	38.4319	41.0721	50.5234	244.881	8.86573	11.7833	18.0602	26.1657	4.87975	127.644	1.16087	50.6466	13.201
2017-10-17	Control	Perlite	21	2.2	1.02455	903.33	4572.72	200.792	41.4637	61.504	1753.69	82.3947	6.54691	42.0785	45.2751	52.5904	286.466	8.25791	15.1839	21.8333	30.1219	7.6022	153.314	2.70483	60.5922	17.0588
2017-10-17	Control	Perlite	21	2.3	1.02768	871.134	4350.77	208.105	46.4409	57.5604	1678.72	76.5416	6.21746	33.5846	47.3041	50.0994	258.225	9.94794	14.3053	20.9441	29.0833	6.41272	137.843	2.57948	53.7785	17.1623
2017-10-17	Control	Perlite	21	2.4	1.02777	591.612	3317.31	139.755	26.2183	46.1364	1162.28	55.1088	5.41632	37.2565	29.3632	49.343	215.245	8.62295	11.994	18.1092	24.2039	6.03298	98.1104	2.51802	44.79	14.7895
2017-10-17	17 mM	Perlite	22	5.1	1.02455	716.055	3814.64	175.546	34.978	55.9094	1455.42	64.3107	5.15346	28.2672	66.8516	48.5839	240.266	6.96691	14.4461	18.4828	23.585	7.04887	112.505	2.64333	48.3175	14.7944
2017-10-17	17 mM	Perlite	22	5.2	1.02805	873.03	4152.6	173.483	33.8845	62.4952	1400.95	74.914	6.14774	35.3341	109.158	55.453	242.332	7.94683	12.9329	21.1778	26.6368	6.05521	132.711	2.74489	49.0997	16.3563
2017-10-17	17 mM	Perlite	22	5.3	1.02507	915.777	4613	214.609	17.8157	64.4359	1752.48	70.9246	5.25861	50.5872	76.706	39.4959	245.832	8.0468	13.1209	25.4217	30.0756	9.51265	146.77	2.61393	54.257	18.2565
2017-10-17	17 mM	Perlite	22	5.4	1.02489	705.657	3785.41	176.701	25.9297	55.8258	1264.78	54.2474	4.6735	36.2606	63.164	36.5578	222.719	10.1567	12.3499	17.8946	24.8331	10.2591	122.72	2.62372	45.4026	4.75549
2017-10-17	34 mM	Perlite	23	8.1	1.03103	728.045	3946.66	172.987	28.1782	65.9038	1307.12	71.2651	5.09331	37.8081	94.0407	48.2112	237.21	8.74318	11.4032	19.8165	26.2605	8.60914	136.664	2.87659	50.8919	15.7439
2017-10-17	34 mM	Perlite	23	8.2	1.03296	733.495	3818.92	131.857	60.3042	75.1995	1020.61	71.0986	6.36303	40.6883	179.962	58.5482	191.8	8.59423	17.5706	22.4875	28.0139	4.84458	132.167	1.98328	107.201	7.37533
2017-10-17	34 mM	Perlite	23	8.3	1.03262	793.781	4226.75	203.621	31.2676	66.7689	1610.01	77.8695	5.70003	45.7758	109.127	44.2166	264.566	8.61201	11.3381	20.642	27.261	11.5343	169.834	2.59186	50.1851	15.1072
2017-10-17	34 mM	Perlite	23	8.4	1.03369	774.947	4095.91	143.735	40.8928	65.2465	1256.92	64.1611	5.84035	37.8434	153.803	50.7025	208.454	6.90505	9.71669	19.8262	26.7002	6.05742	116.972	1.60222	116.456	9.65466
2017-10-17	Control	Rockwool	31	3.1	1.02572	1016.35	5038.7	192.282	23.6532	60.0767	1727.76	82.3555	7.37496	41.0393	58.4663	75.996	305.933	9.27255	15.6013	21.9813	30.7205	7.27239	143.581	2.55406	51.5324	9.73413
2017-10-17	Control	Rockwool	31	3.2	1.02824	889.907	4186.16	180.753	22.7034	50.4555	1403.1	73.6936	5.7684	42.9082	72.9533	63.8637	245.234	8.63717	13.0175	19.2486	27.2071	8.09221	151.007	3.97927	46.394	11.9995
2017-10-17	Control	Rockwool	31	3.3	1.02909	818.39	3972.5	186.028	22.9692	50.9603	1531.64	60.15	5.35124	40.5974	59.5943	43.0775	248.627	7.50203	12.0815	16.6094	24.5848	8.46937	103.649	2.77853	44.333	7.26534
2017-10-17	Control	Rockwool	31	3.4	1.02952	882.484	4447.38	197.359	29.2487	62.9757	1720.86	73.8578	7.53609	41.0058	62.9654	69.7088	271.958	10.7894	16.4929	22.6288	30.8856	7.0831	145.492	2.79	47.7697	14.7736
2017-10-17	17 mM	Rockwool	32	6.1	1.02572	610.501	3184.9	142.74	13.3242	46.6295	1087.94	51.5324	4.2465	32.6283	56.7328	52.5479	178.107	8.44172	14.555	15.0166	20.3196	7.24162	97.4234	2.72843	33.3258	10.9958
2017-10-17	17 mM	Rockwool	32	6.2	1.03077	921.224	4980.75	189.106	39.9116	68.2476	1456.2	75.9681	7.04019	47.4363	174.737	82.7094	224.235	9.40067	13.6165	24.0171	31.0469	6.58665	164.326	2.84494	55.0228	14.6473
2017-10-17	17 mM	Rockwool	32	6.3	1.027	866.952	4763.62	182.231	35.4212	63.8897	1615.76	67.5561	7.54845	44.6232	124.575	73.0813	246.593	9.32516	18.1163	21.1767	27.5749	7.26089	142.096	2.79344	46.3793	14.0699
2017-10-17	17 mM	Rockwool	32	6.4	1.03137	635.984	3579.62	145.268	29.1568	54.116	1187.42	54.3223	5.62097	36.7477	102.209	59.3038	165.556	8.19939	10.5303	17.8324	22.5251	5.1156	112.976	2.61968	43.0184	11.0769
2017-10-17	34 mM	Rockwool	33	9.1	1.03159	733.007	3701.31	148.797	35.4145	55.8606	1321.12	55.056	5.09605	37.3436	198.963	52.2707	217.676	5.39522	12.8123	19.3836	27.3578	8.86136	132.405	1.59896	143.009	9.38747
2017-10-17	34 mM	Rockwool	33	9.2	1.03584	857.676	4293.35	171.038	47.4415	72.602	1365.6	69.3909	7.71701	45.5045	206.816	83.4266	224.166	6.8469	14.2428	26.3311	31.7071	6.16325	154.527	2.28921	139.724	9.89227
2017-10-17	34 mM	Rockwool	33	9.3	1.03212	901.448	5054.34	200.583	41.863	79.1124	1547.75	70.6593	6.8017	51.276	306.17	65.9734	265.349	10.8373	13.3867	25.8754	30.8296	7.80286	153.24	3.34409	60.4928	12.9428
2017-10-17	34 mM	Rockwool	33	9.4	1.03589	691.146	3777.66	178.37	45.2684	65.7997	1320.9	50.6447	7.27195	44.8126	243.931	78.0647	242.502	9.61306	11.3844	27.2128	29.9269	4.50612	113.067	3.48059	49.4327	11.7366
na: not available due to technical problems

## Sheet: Raw data for Fig 6
Supplementary File S1: Raw data for Fig 6; leaf area, dry matter and Cl, Na, K, Mg, and Ca content of leaves.
Date	Substrate	Salinity level	Sample	Total Leaf Area	Singel Leaf Area	Dry matter	Cl		K		Na		Mg		Ca
			No.	cm²	cm²	% (w/w)	Averagea	SDa	Averagea	SDa	Averagea	SDa	Averagea	SDa	Averagea	SDa
							mg g-1 DW	mg g-1 DW	mg g-1 DW	mg g-1 DW	mg g-1 DW	mg g-1 DW	mg g-1 DW	mg g-1 DW	mg g-1 DW	mg g-1 DW
2017-10-20	Coco peat	Control	1.1	1709.63	569.877	12.4046	9.10737	0.222656	49.1121	0.621943	3.38455	0.0729009	5.59537	0.0169107	29.9937	0.270619
2017-10-20	Coco peat	Control	1.2	2036.32	678.773	11.5939	9.41322	0.0670341	48.7662	5.44498	3.06744	0.034627	4.52549	0.0442202	27.5988	0.0871782
2017-10-20	Coco peat	Control	1.3	1770.94	590.313	11.9865	12.7043	0.288977	49.0846	0.18382	3.09535	0.0140661	4.9716	0.0650454	27.0184	0.715609
2017-10-20	Coco peat	Control	1.4	2437.47	812.49	11.7974	12.2962	0.0181342	50.6491	0.207187	2.54782	0.0378134	4.95914	0.0425259	30.8807	0.139954
2017-10-20	Perlite	Control	2.1	2233.98	744.66	11.7941	8.38558	0.0396016	45.9285	3.01319	2.04689	0.178115	5.38446	0.0622038	34.6227	0.254372
2017-10-20	Perlite	Control	2.2	2941.33	980.443	11.411	9.81984	0.0624738	44.7032	0.506427	2.0041	0.0334918	4.66678	0.0560002	31.7406	0.0847312
2017-10-20	Perlite	Control	2.3	1825.78	608.593	12.0666	7.69762	0.14689	46.7154	0.913991	1.74282	0.00659491	4.84978	0.121898	28.6784	0.156283
2017-10-20	Perlite	Control	2.4	2068.17	689.39	11.5707	10.5548	0.0279167	44.6082	1.53417	2.54533	0.0652412	5.35114	0.110039	33.3728	0.300015
2017-10-20	Rockwool	Control	3.1	2058.49	686.163	11.9622	9.26914	0.422369	52.7428	1.14958	2.32893	0.0683332	4.35058	0.0137893	27.1533	0.195511
2017-10-20	Rockwool	Control	3.2	1536.34	512.113	11.8786	9.95953	0.0360768	57.0285	2.84801	2.64391	0.150555	4.46961	0.00152635	23.5893	0.121063
2017-10-20	Rockwool	Control	3.3	2160.43	720.143	12.2204	8.71983	0.176143	53.7617	1.25001	2.68411	0.047262	4.37804	0.0188903	26.6454	2.66197
2017-10-20	Rockwool	Control	3.4	2039.1	679.7	12.0789	9.83572	0.246481	52.4956	0.0845597	2.6283	0.198439	4.86912	0.0327781	30.45	1.49211
2017-10-20	Coco peat	17 mM	4.1	2191.79	730.597	10.9685	25.7688	0.786999	37.7624	0.18735	12.4833	0.0416583	4.63847	0.0481968	33.5923	0.56351
2017-10-20	Coco peat	17 mM	4.2	2384.74	794.913	11.0872	27.2535	0.0896522	36.0515	0.218135	13.1606	0.272723	4.57429	0.00895829	31.0054	0.632069
2017-10-20	Coco peat	17 mM	4.3	1451.16	483.72	11.6416	28.4759	0.0526036	37.2996	0.663009	11.5494	0.00385236	4.49966	0.00850578	26.9345	0.274538
2017-10-20	Coco peat	17 mM	4.4	1937.3	645.767	12.0296	25.2212	0.00643171	37.2112	0.954991	11.341	0.143004	4.70718	0.00967563	30.5219	0.0413575
2017-10-20	Perlite	17 mM	5.1	2752.09	917.363	10.7848	22.7544	0.0734348	38.7701	0.400157	11.7922	0.103861	4.23385	0.0313904	31.8609	0.215893
2017-10-20	Perlite	17 mM	5.2	2417.93	805.977	9.47499	21.9717	0.684779	40.374	0.154115	13.1456	0.324892	4.10663	0.071976	26.7218	0.00179607
2017-10-20	Perlite	17 mM	5.3	1587.73	529.243	11.5483	23.0827	0.463461	35.8644	2.74917	11.9938	0.201772	4.51464	0.00321178	28.851	0.106429
2017-10-20	Perlite	17 mM	5.4	1679.93	559.977	11.7069	20.6857	0.691424	38.5019	0.421239	9.67942	0.074243	4.48925	0.0300586	27.8955	0.0181049
2017-10-20	Rockwool	17 mM	6.1	2284.34	761.447	11.1717	17.5399	n.a.b	49.5817	1.24889	9.55376	0.462851	4.59394	0.0311461	36.1435	0.172157
2017-10-20	Rockwool	17 mM	6.2	1512.78	504.26	10.8301	23.3	0.224427	39.1845	0.42322	12.8702	0.59137	4.43152	0.0325862	26.0912	0.331185
2017-10-20	Rockwool	17 mM	6.3	2301.91	767.303	10.5988	22.4536	0.48129	39.4194	0.00589375	14.8045	0.258439	3.95891	0.0490378	33.6298	0.801082
2017-10-20	Rockwool	17 mM	6.4	2392.79	797.597	11.7519	21.3419	0.210825	37.7008	0.433521	11.95	0.0566745	4.00799	0.0212612	29.6574	0.170164
2017-10-20	Coco peat	34 mM	7.1	856.02	285.34	11.403	47.2728	0.166078	27.198	0.430127	20.8491	0.0352108	3.84531	0.0105966	19.9416	0.11762
2017-10-20	Coco peat	34 mM	7.2	1368.64	456.213	12.8759	30.3204	0.31213	34.2469	0.332582	11.7368	0.154066	3.81383	0.0379759	23.6609	0.440411
2017-10-20	Coco peat	34 mM	7.3	860.1	286.7	11.2653	45.3822	0.525388	31.3499	0.0812541	17.2738	0.0128514	4.17179	0.0801261	22.6562	0.336982
2017-10-20	Coco peat	34 mM	7.4	949.63	316.543	13.4098	46.7233	0.0432504	28.1112	0.256631	20.9066	0.483847	4.04468	0.0433489	25.3174	0.063566
2017-10-20	Perlite	34 mM	8.1	2116.2	705.4	11.1642	30.2782	0.405121	38.8353	0.362213	14.1026	0.178396	4.57431	0.0364436	29.53	0.107993
2017-10-20	Perlite	34 mM	8.2	1870.95	623.65	13.3923	25.6792	0.199895	36.5797	0.426907	10.9236	0.121153	4.7	0.0233866	27.3381	0.513072
2017-10-20	Perlite	34 mM	8.3	1939.28	646.427	11.1585	31.5443	0.632199	37.1981	0.389309	16.4113	0.038899	4.05295	0.0163109	29.8809	0.00917886
2017-10-20	Perlite	34 mM	8.4	1843.9	614.633	13.2098	23.5301	0.0480921	33.8268	0.399905	9.57094	0.161889	4.10459	0.00237115	30.388	0.277426
2017-10-20	Rockwool	34 mM	9.1	1803.27	601.09	11.7986	40.3287	0.767964	31.455	0.150915	18.7905	0.363373	4.09198	0.105223	30.3956	0.297306
2017-10-20	Rockwool	34 mM	9.2	1403.29	467.763	13.2697	27.3648	0.722875	34.4418	0.246162	10.6225	0.00834446	4.35915	0.0801068	27.8959	0.30499
2017-10-20	Rockwool	34 mM	9.3	1187.52	395.84	11.8874	47.0975	0.551469	27.4194	0.00992309	23.1002	0.0636181	4.43634	0.0362064	27.0167	0.180507
2017-10-20	Rockwool	34 mM	9.4	864.99	288.33	13.0841	40.2071	0.0975569	25.721	0.654514	19.6746	0.494398	4.21304	0.0627274	25.9202	0.182735
a Average and stanadrd deviation (SD) of three technical measurements (the same extract was measures three times by ICP-OES)
b Due to technical problems teh sample was only measured once.

## Sheet: Raw data for Fig 6H
Supplementary File S1: Raw data for Fig 6H; vegetative biomass of plants at the end of the experiment.
Date	Substrate	Salinity	Sample	Vegetative biomass	Vegetative biomass
			No.	g	kg m-2
2017-10-30	Coco peat	Control	1.1	3812	2.79554
2017-10-30	Coco peat	Control	1.2	4278	3.13728
2017-10-30	Coco peat	Control	1.3	3919	2.87401
2017-10-30	Coco peat	Control	1.4	4045	2.96641
2017-10-30	Perlite	Control	2.1	4462	3.27222
2017-10-30	Perlite	Control	2.2	4124	3.02435
2017-10-30	Perlite	Control	2.3	3846	2.82048
2017-10-30	Perlite	Control	2.4	3416	2.50513
2017-10-30	Rockwool	Control	3.1	5180	3.79877
2017-10-30	Rockwool	Control	3.2	4518	3.31329
2017-10-30	Rockwool	Control	3.3	4588	3.36462
2017-10-30	Rockwool	Control	3.4	4323	3.17028
2017-10-30	Coco peat	17 mM	4.1	3612	2.64887
2017-10-30	Coco peat	17 mM	4.2	4005	2.93708
2017-10-30	Coco peat	17 mM	4.3	3330	2.44207
2017-10-30	Coco peat	17 mM	4.4	3959	2.90334
2017-10-30	Perlite	17 mM	5.1	3773	2.76694
2017-10-30	Perlite	17 mM	5.2	3850	2.82341
2017-10-30	Perlite	17 mM	5.3	3595	2.6364
2017-10-30	Perlite	17 mM	5.4	3455	2.53373
2017-10-30	Rockwool	17 mM	6.1	3750	2.75007
2017-10-30	Rockwool	17 mM	6.2	3913	2.86961
2017-10-30	Rockwool	17 mM	6.3	3847	2.82121
2017-10-30	Rockwool	17 mM	6.4	3688	2.70461
2017-10-30	Coco peat	34 mM	7.1	2881	2.11279
2017-10-30	Coco peat	34 mM	7.2	3359	2.46333
2017-10-30	Coco peat	34 mM	7.3	2725	1.99839
2017-10-30	Coco peat	34 mM	7.4	2386	1.74978
2017-10-30	Perlite	34 mM	8.1	3406	2.4978
2017-10-30	Perlite	34 mM	8.2	3252	2.38486
2017-10-30	Perlite	34 mM	8.3	3334	2.445
2017-10-30	Perlite	34 mM	8.4	3299	2.41933
2017-10-30	Rockwool	34 mM	9.1	3208	2.3526
2017-10-30	Rockwool	34 mM	9.2	3429	2.51467
2017-10-30	Rockwool	34 mM	9.3	2942	2.15752
2017-10-30	Rockwool	34 mM	9.4	2683	1.96759

## Sheet: Raw data for Fig 7
Supplementary File S1: Raw data for Figure 7; Cl, Na, K, Ca, Mg in fruits.
Date	Substrate	Salinity	Sample	Density	%Dry Matter	Cl (mg/l)	Cl	K	K	Na	Na	Ca	Ca	Mg	Mg
			No.			mg L-1	mg kg-1 FW	mg kg-1 FW	mg kg-1 FW	mg kg-1 FW	mg kg-1 FW	mg kg-1 FW	mg kg-1 FW	mg kg-1 FW	mg kg-1 FW
2017-09-11	Coco peat	Control	1.1	1.02238	8.14976	390.9	399.648	40.9085	3333.94	1.00023	81.5168	0.656334	53.4897	1.25985	102.674
2017-09-11	Coco peat	Control	1.2	1.02509	7.27262	358.8	367.8	44.171	3212.39	0.97985	71.2608	0.661608	48.1162	1.34475	97.7987
2017-09-11	Coco peat	Control	1.3	1.02429	7.34982	360.6	369.357	42.7076	3138.93	0.92958	68.3225	0.702375	51.6233	1.24559	91.5487
2017-09-11	Coco peat	Control	1.4	1.02448	7.63365	310.2	317.795	42.2622	3226.15	0.920206	70.2454	0.64751	49.4286	1.32287	100.983
2017-09-11	Perlite	Control	2.1	1.02426	7.66347	383.5	392.806	41.8805	3209.5	0.899087	68.9013	0.899087	68.9013	1.33041	101.955
2017-09-11	Perlite	Control	2.2	1.02408	7.29255	299.6	306.816	41.6965	3040.74	0.826443	60.2688	0.91859	66.9887	1.32173	96.3881
2017-09-11	Perlite	Control	2.3	1.02076	6.87619	309.5	315.925	41.4755	2851.93	0.713357	49.0518	0.863189	59.3545	1.41876	97.5565
2017-09-11	Perlite	Control	2.4	1.02258	7.20986	326	333.363	36.9724	2665.65	0.715914	51.6164	0.800139	57.6889	1.30673	94.2133
2017-09-11	Rockwool	Control	3.1	1.02358	7.51275	310.9	318.233	39.8655	2995	0.57141	42.9286	0.849851	63.8472	1.30988	98.4084
2017-09-11	Rockwool	Control	3.2	1.02315	7.23852	278.4	284.845	39.0975	2830.08	0.534319	38.6767	0.806902	58.4078	1.27206	92.0781
2017-09-11	Rockwool	Control	3.3	1.02246	6.93178	233.5	238.746	41.6384	2886.28	0.629726	43.6512	0.704763	48.8526	1.37421	95.2575
2017-09-11	Rockwool	Control	3.4	1.02351	7.06903	246.5	252.295	43.0032	3039.91	0.774111	54.7221	0.691361	48.8725	1.49751	105.859
2017-09-11	Coco peat	17 mM	4.1	1.02948	8.46739	507.3	522.253	38.4461	3255.38	1.91334	162.01	0.586126	49.6296	1.18279	100.152
2017-09-11	Coco peat	17 mM	4.2	1.02689	8.38895	486	499.069	37.1762	3118.69	1.99439	167.309	0.557643	46.7804	1.17652	98.6975
2017-09-11	Coco peat	17 mM	4.3	1.02826	8.57286	436.9	449.245	41.6014	3566.43	1.49152	127.866	0.543115	46.5605	1.26489	108.437
2017-09-11	Coco peat	17 mM	4.4	1.02791	8.77024	478.8	492.161	37.6584	3302.73	1.62511	142.526	0.551986	48.4105	1.13813	99.8164
2017-09-11	Perlite	17 mM	5.1	1.02653	8.38471	457.2	469.33	37.2023	3119.31	1.22218	102.476	0.714642	59.9207	1.16337	97.5453
2017-09-11	Perlite	17 mM	5.2	1.02636	8.13157	434.4	445.849	37.1777	3023.13	1.20904	98.3138	0.763723	62.1026	1.14558	93.154
2017-09-11	Perlite	17 mM	5.3	1.02867	8.09851	375.5	386.266	38.3594	3106.54	1.32228	107.085	0.690223	55.8978	1.18915	96.3037
2017-09-11	Perlite	17 mM	5.4	1.02636	8.26397	404	414.649	33.9216	2803.27	1.18017	97.5293	0.656402	54.2448	1.04642	86.4759
2017-09-11	Rockwool	17 mM	6.1	1.02838	8.41744	458.8	471.818	37.7285	3175.77	1.58863	133.722	0.576137	48.496	1.14863	96.6851
2017-09-11	Rockwool	17 mM	6.2	1.02497	8.06142	434	444.835	38.7342	3122.53	1.30217	104.973	0.603053	48.6147	1.10364	88.9692
2017-09-11	Rockwool	17 mM	6.3	1.02543	7.78303	389.2	399.097	36.5612	2845.57	1.25121	97.3821	0.722021	56.1951	1.13727	88.5137
2017-09-11	Rockwool	17 mM	6.4	1.02606	8.07749	439.3	450.748	37.3711	3018.65	1.50966	121.943	0.673138	54.3727	1.15566	93.3486
2017-09-11	Coco peat	34 mM	7.1	1.02973	9.64646	611.4	629.574	36.0588	3478.4	1.9018	183.456	0.596429	57.5342	1.04867	101.159
2017-09-11	Coco peat	34 mM	7.2	1.02785	8.5992	573.4	589.369	37.8174	3252	1.77525	152.657	0.627093	53.925	1.13806	97.8638
2017-09-11	Coco peat	34 mM	7.3	1.03126	10.1302	650	670.316	36.6344	3711.15	2.15777	218.587	0.609036	61.6967	1.10888	112.332
2017-09-11	Coco peat	34 mM	7.4	1.03279	9.68384	652.1	673.479	34.873	3377.05	1.92157	186.082	0.729486	70.6423	1.09719	106.251
2017-09-11	Perlite	34 mM	8.1	1.03024	8.63388	556.8	573.635	37.0276	3196.92	1.56001	134.689	0.734697	63.4328	1.15711	99.9037
2017-09-11	Perlite	34 mM	8.2	1.02716	8.94853	554.9	569.968	36.2997	3248.29	1.55761	139.384	0.796028	71.2329	1.13472	101.541
2017-09-11	Perlite	34 mM	8.3	1.02988	9.03831	517.3	532.754	36.9715	3341.6	1.37932	124.667	0.880612	79.5924	1.04109	94.0971
2017-09-11	Perlite	34 mM	8.4	n.a	n.a	n.a	n.a	n.a	n.a	n.a	n.a	n.a	n.a	n.a	n.a
2017-09-11	Rockwool	34 mM	9.1	n.a	n.a	n.a	n.a	n.a	n.a	n.a	n.a	n.a	n.a	n.a	n.a
2017-09-11	Rockwool	34 mM	9.2	1.02657	7.95183	501.1	514.414	40.1082	3189.34	1.42912	113.641	0.702322	55.8474	1.13179	89.9981
2017-09-11	Rockwool	34 mM	9.3	n.a	n.a	n.a	n.a	n.a	n.a	n.a	n.a	n.a	n.a	n.a	n.a
2017-09-11	Rockwool	34 mM	9.4	1.02335	8.08127	525.8	538.077	39.3753	3182.02	1.80419	145.801	0.692017	55.9237	1.20766	97.5942
2017-10-10	Coco peat	Control	1.1	1.03002	8.62495	365.6	376.577	43.5395	3755.26	1.18097	101.858	0.543736	46.8969	1.37204	118.338
2017-10-10	Coco peat	Control	1.2	1.02699	8.41975	307.6	315.901	45.4439	3826.26	0.82516	69.4764	0.621876	52.3604	1.47217	123.953
2017-10-10	Coco peat	Control	1.3	1.02697	8.34853	325.2	333.971	45.1758	3771.52	1.09151	91.1253	0.57538	48.0358	1.59169	132.883
2017-10-10	Coco peat	Control	1.4	1.02619	8.45736	261.9	268.76	44.4598	3760.13	0.78091	66.0444	0.518524	43.8535	1.42126	120.201
2017-10-10	Perlite	Control	2.1	1.02897	8.66302	294.5	303.033	41.3735	3584.19	0.723052	62.6382	0.650747	56.3744	1.37167	118.828
2017-10-10	Perlite	Control	2.2	1.02977	8.53463	255.5	263.105	41.863	3572.85	0.59305	50.6146	0.612112	52.2415	1.35237	115.419
2017-10-10	Perlite	Control	2.3	1.02588	8.28574	295.1	302.737	40.3203	3340.84	0.609696	50.5178	0.59122	48.9869	1.42154	117.785
2017-10-10	Perlite	Control	2.4	1.02504	8.08412	295.8	303.207	42.78	3458.39	0.675959	54.6453	0.59535	48.1288	1.39568	112.828
2017-10-10	Rockwool	Control	3.1	1.02982	8.30804	260.3	268.062	45.1199	3748.58	0.662855	55.0703	0.627427	52.1269	1.47885	122.864
2017-10-10	Rockwool	Control	3.2	1.0273	8.11162	261.9	269.051	41.8547	3395.1	0.582989	47.2898	0.900053	73.0088	1.45463	117.994
2017-10-10	Rockwool	Control	3.3	1.02858	8.51521	257.9	265.269	42.4613	3615.67	0.660297	56.2256	0.641127	54.5933	1.42709	121.52
2017-10-10	Rockwool	Control	3.4	1.02767	8.13175	268.2	275.622	44.5403	3621.9	0.798992	64.972	0.577111	46.9292	1.46354	119.012
2017-10-10	Coco peat	17 mM	4.1	1.03234	9.22271	625	645.212	37.2889	3439.05	2.92753	269.997	0.475748	43.8769	1.29132	119.094
2017-10-10	Coco peat	17 mM	4.2	1.03101	9.48651	571.6	589.325	36.4558	3458.38	2.95502	280.328	0.410364	38.9292	1.20724	114.525
2017-10-10	Coco peat	17 mM	4.3	1.02954	9.25094	584	601.251	41.8034	3867.21	2.94929	272.837	0.496698	45.9492	1.36651	126.415
2017-10-10	Coco peat	17 mM	4.4	1.02959	8.94333	568.6	585.425	39.9376	3571.75	2.72574	243.772	0.424337	37.9498	1.19813	107.152
2017-10-10	Perlite	17 mM	5.1	1.02945	8.66672	488.1	502.475	40.0722	3472.94	2.19932	190.609	0.592301	51.3331	1.21674	105.452
2017-10-10	Perlite	17 mM	5.2	1.0307	8.67279	431.7	444.953	39.4937	3425.2	1.80335	156.4	0.630789	54.707	1.20989	104.931
2017-10-10	Perlite	17 mM	5.3	1.0296	8.73001	448.2	461.464	39.2552	3426.98	2.24644	196.114	0.631092	55.0944	1.26114	110.098
2017-10-10	Perlite	17 mM	5.4	1.03019	8.88098	490.4	505.205	38.6561	3433.04	2.441	216.785	0.558181	49.5719	1.26513	112.356
2017-10-10	Rockwool	17 mM	6.1	1.03102	8.7482	402.8	415.293	38.3573	3355.58	1.62256	141.945	0.5394	47.1878	1.23463	108.008
2017-10-10	Rockwool	17 mM	6.2	1.03328	8.93375	485.9	502.071	39.0981	3492.93	1.92549	172.018	0.609738	54.4725	1.15529	103.211
2017-10-10	Rockwool	17 mM	6.3	1.03022	9.25333	496.1	511.092	38.2061	3535.33	2.32411	215.058	0.552076	51.0855	1.22894	113.718
2017-10-10	Rockwool	17 mM	6.4	1.02917	8.83988	417.8	429.985	39.6983	3509.28	1.91723	169.481	0.582409	51.4842	1.20994	106.957
2017-10-10	Coco peat	34 mM	7.1	1.03423	9.9903	859.2	888.61	33.1862	3315.4	3.84102	383.73	0.662213	66.157	1.24413	124.292
2017-10-10	Coco peat	34 mM	7.2	1.03375	9.60677	884.5	914.352	36.5342	3509.75	4.59192	441.135	0.518621	49.8227	1.31132	125.975
2017-10-10	Coco peat	34 mM	7.3	1.03381	10.4606	804.4	831.597	33.7571	3531.2	3.72281	389.428	0.564966	59.0988	1.22188	127.816
2017-10-10	Coco peat	34 mM	7.4	1.03258	9.89847	845.1	872.633	34.6504	3429.86	3.8181	377.933	0.613653	60.7422	1.32566	131.22
2017-10-10	Perlite	34 mM	8.1	1.03152	9.17918	646.7	667.084	37.8498	3474.3	2.84221	260.892	0.596994	54.7992	1.22087	112.066
2017-10-10	Perlite	34 mM	8.2	1.03321	9.4951	659.5	681.399	39.0008	3703.16	2.9745	282.432	0.594177	56.4177	1.19106	113.093
2017-10-10	Perlite	34 mM	8.3	1.02828	8.91511	620.6	638.147	40.0069	3566.66	2.84117	253.294	0.648228	57.7903	1.27774	113.912
2017-10-10	Perlite	34 mM	8.4	1.0316	9.28081	595.3	614.109	38.4714	3570.46	2.64472	245.451	0.674736	62.621	1.23059	114.208
2017-10-10	Rockwool	34 mM	9.1	1.02902	8.90545	505.5	520.17	37.9831	3382.57	2.22727	198.349	0.766462	68.2569	1.08479	96.6055
2017-10-10	Rockwool	34 mM	9.2	1.02901	9.1635	549.2	565.132	38.1366	3494.64	2.48621	227.824	0.715959	65.6069	1.10605	101.353
2017-10-10	Rockwool	34 mM	9.3	1.03135	9.70164	682.5	703.896	37.4554	3633.79	3.85767	374.257	0.609651	59.1462	1.18444	114.91
2017-10-10	Rockwool	34 mM	9.4	1.03323	9.7977	675.4	697.84	36.9178	3617.09	3.55208	348.022	0.576681	56.5014	1.16869	114.505
n.a.	not available since there were no ripe fruits at the time of the harvest
