# Supplementary material
Source: MDPI journal article supplement (https://www.mdpi.com/2311-7524/8/1/59)
Supplement: s1 [file s1 › Supplementary Table S1.pdf]

**Supplementary Table S1: Greenhouse air temperature and relative humidity.**

| Month     | Greenhouse air temperature [°C] |     |      |      | Relative humidity [%] |      |      |      |
|-----------|---------------------------------|-----|------|------|-----------------------|------|------|------|
|           | Mean                            | SD  | Max  | Min  | Mean                  | SD   | Max  | Min  |
| May*      | 23.4                            | 5.4 | 39.3 | 17.4 | 51.4                  | 17.3 | 87.2 | 13.3 |
| June      | 23.9                            | 5.5 | 40.3 | 17.4 | 55.9                  | 18.3 | 87.8 | 16.3 |
| July      | 23.5                            | 5.5 | 41.2 | 17.5 | 60.7                  | 18.5 | 88.0 | 14.9 |
| August    | 23.3                            | 5.7 | 42.9 | 17.0 | 63.8                  | 17.2 | 92.4 | 19.3 |
| September | 19.4                            | 3.1 | 33.1 | 15.8 | 57.7                  | 10.8 | 82.2 | 19.5 |
| October   | 19.2                            | 2.6 | 35.4 | 17.0 | 57.6                  | 11.3 | 83.2 | 16.3 |

\* From the start of the culture, 13<sup>th</sup> of May 2017.
