# Supplementary material
Source: MDPI journal article supplement (https://www.mdpi.com/2311-7524/8/1/59)
Supplement: s1 [file s1 › Supplementary Table S2.pdf]

**Supplementary Table S2: Ion composition and EC of the nutrient solutions used.**

|                              | Ion                           | Stage I <sup>a</sup> | Stage II <sup>b</sup> | Stage III <sup>c</sup> | Stage IV <sup>d</sup> |
|------------------------------|-------------------------------|----------------------|-----------------------|------------------------|-----------------------|
| Macronutrients (mM)          | NO <sub>3</sub> <sup>-</sup>  | 10.0                 | 14.0                  | 12.00                  | 14.5                  |
|                              | NH <sub>4</sub> <sup>+</sup>  | 1.0                  | 1.4                   | 1.2                    | 1.3                   |
|                              | PO <sub>4</sub> <sup>3-</sup> | 1.5                  | 1.5                   | 1.5                    | 1.5                   |
|                              | K <sup>+</sup>                | 5.1                  | 7.0                   | 7.5                    | 8.5                   |
|                              | Ca <sup>2+</sup>              | 3.00                 | 4.5                   | 4.00                   | 4.7                   |
|                              | Mg <sup>2+</sup>              | 2.0                  | 2.0                   | 2.0                    | 2.2                   |
|                              | SO <sub>4</sub> <sup>2-</sup> | 1.8                  | 2.5                   | 3.1                    | 3.7                   |
|                              | Cl <sup>-</sup>               | 1.0                  | 1.0                   | 1.0                    | 1.0                   |
| Micronutrients<br>( $\mu$ M) | Fe                            | 35.0                 | 45.0                  | 45.0                   | 45.0                  |
|                              | B                             | 30.0                 | 30.0                  | 45.0                   | 45.0                  |
|                              | Cu                            | 1.0                  | 1.0                   | 1.0                    | 1.0                   |
|                              | Zn                            | 5.0                  | 5.0                   | 5.0                    | 5.0                   |
|                              | Mn                            | 10.0                 | 10.0                  | 10.0                   | 10.0                  |
|                              | Mo                            | 1.0                  | 1.0                   | 1.0                    | 1.0                   |
| EC<br>(mS cm <sup>-1</sup> ) |                               | 1.8                  | 2.3                   | 2.4                    | 2.4                   |

<sup>a</sup>used from the 13<sup>th</sup> of May 2017 to 18<sup>th</sup> of May 2017 at the start of the tomato plantation.

<sup>b</sup>used from 19<sup>th</sup> of May 2017 to 7<sup>th</sup> of June 2017 to encourage vegetative growth in the tomato plants.

<sup>c</sup>used from 8<sup>th</sup> of June 2017 to 25<sup>th</sup> of July 2018, the day of first fruit set.

<sup>d</sup>used from the 26<sup>th</sup> of July 2018 to 30<sup>th</sup> of October 2017, the end of the experiment.
