# Supplementary material
Source: MDPI journal article supplement (https://www.mdpi.com/2311-7524/8/1/59)
Supplement: s1 [file s1 › Supplementary Table S3.pdf]

**Supplementary Table S3: Chemicals used for the preparation of the stock solutions.**

| <b>Stock solution A</b>                                                             |                                      |                                                                  |
|-------------------------------------------------------------------------------------|--------------------------------------|------------------------------------------------------------------|
| Chemical formula                                                                    | Chemical name                        | Product name, Company                                            |
| $\text{NH}_4\text{NO}_3$                                                            | Ammonium nitrate                     | YaraTera AMNITRA L, Yara GmbH & Co. KG, Dülmen, Germany          |
| $5\text{Ca}(\text{NO}_3)_2 \cdot \text{NH}_4\text{NO}_3 \cdot 10\text{H}_2\text{O}$ | Calcium ammonium nitrate             | YaraLiva CALCINIT, Yara GmbH & Co. KG, Dülmen, Germany           |
| $\text{Ca}(\text{NO}_3)_2 \cdot 4\text{H}_2\text{O}$                                | Calcium nitrate tetrahydrate         | Merk Chemicals GmbH, Darmstadt, Germany                          |
| $\text{KNO}_3$                                                                      | Potassium nitrate                    | YaraTera KRISTA K PLUS, Yara GmbH & Co. KG, Dülmen, Germany      |
| $\text{CaCl}_2 \cdot 2\text{H}_2\text{O}$                                           | Calcium chloride dihydrate           | Merk Chemicals GmbH, Darmstadt, Germany                          |
| $\text{Na}[\text{Fe}(\text{EDTA})] \cdot 3\text{H}_2\text{O}$                       | Iron(III) EDTA complex               | Fetrilon 13%, Compo Expert GmbH, Münster, Germany                |
| <b>Stock solution B</b>                                                             |                                      |                                                                  |
| Chemical formula                                                                    | Chemical name                        | Product name, Company                                            |
| $\text{Mg}(\text{NO}_3)_2 \cdot 6\text{H}_2\text{O}$                                | Magnesium nitrate hexahydrate        | YaraTera KRISTA MAG, Yara GmbH & Co. KG, Dülmen, Germany         |
| $\text{KH}_2\text{PO}_4$                                                            | Potassium dihydrogen phosphate       | YaraTera KRISTA MKP, Yara GmbH & Co. KG, Dülmen, Germany         |
| $\text{K}_2\text{SO}_4$                                                             | Potassium sulfate                    | YaraTera KRISTA SOP, Yara GmbH & Co. KG, Dülmen, Germany         |
| $\text{H}_3\text{BO}_3$                                                             | Boric acid                           | Merk Chemicals GmbH, Darmstadt, Germany                          |
| $\text{CuSO}_4 \cdot 5\text{H}_2\text{O}$                                           | Copper sulphate pentahydrate         | Merk Chemicals GmbH, Darmstadt, Germany                          |
| $\text{ZnSO}_4 \cdot 7\text{H}_2\text{O}$                                           | Zinc sulphate heptahydrate           | Merk Chemicals GmbH, Darmstadt, Germany                          |
| $\text{MnSO}_4 \cdot \text{H}_2\text{O}$                                            | Manganese sulfate 1-hydrate          | Merk Chemicals GmbH, Darmstadt, Germany                          |
| $(\text{NH}_4)_6\text{Mo}_7\text{O}_{24} \cdot 4\text{H}_2\text{O}$                 | Ammonium heptamolybdate tetrahydrate | Merk Chemicals GmbH, Darmstadt, Germany                          |
| <b>Stock solution NaCl</b>                                                          |                                      |                                                                  |
| Chemical formula                                                                    | Chemical name                        | Product name, Company                                            |
| $\text{NaCl}$                                                                       | Sodium chloride                      | Südwestdeutsche Salzwerte AG<br>Salzgrund 67, Heilbronn, Germany |
