# Supplementary material
Source: MDPI journal article supplement (https://www.mdpi.com/2311-7524/8/1/59)
Supplement: s1 [file s1 › Supplementary Table S4.pdf]

**Supplementary Table S4: Amount of salts required for preparation of 1 litre of a 100-fold stock solution.**

| <b>Stock solution A</b>                                                                 |         |          |           |          |
|-----------------------------------------------------------------------------------------|---------|----------|-----------|----------|
| Chemical formula                                                                        | Stage I | Stage II | Stage III | Stage IV |
| NH <sub>4</sub> NO <sub>3</sub>                                                         | 9.77    | 13.44    | 16.13     | 10.44    |
| 5Ca(NO <sub>3</sub> ) <sub>2</sub> ·NH <sub>4</sub> NO <sub>3</sub> ·10H <sub>2</sub> O | -       | -        | -         | 109.20   |
| Ca(NO <sub>3</sub> ) <sub>2</sub> · 4 H <sub>2</sub> O                                  | 70.80   | 113.40   | 136.08    | -        |
| KNO <sub>3</sub>                                                                        | -       | 56.40    | 67.68     | -        |
| CaCl <sub>2</sub> ·2H <sub>2</sub> O                                                    | 8.88    | 8.88     | 10.66     | 8.88     |
| Na[Fe(EDTA)].3H <sub>2</sub> O                                                          | 1.80    | 2.29     | 2.29      | 2.29     |
| <b>Stock solution B</b>                                                                 |         |          |           |          |
| Chemical formula                                                                        |         |          |           |          |
| Mg(NO <sub>3</sub> ) <sub>2</sub> ·6H <sub>2</sub> O                                    | 61.09   | -        | -         | 69.60    |
| KH <sub>2</sub> PO <sub>4</sub>                                                         | 24.47   | 24.47    | 29.37     | 24.47    |
| K <sub>2</sub> SO <sub>4</sub>                                                          | -       | 9.60     | 11.52     | 78.00    |
| H <sub>3</sub> BO <sub>3</sub>                                                          | 0.22    | 0.22     | 0.27      | 0.33     |
| CuSO <sub>4</sub> ·5H <sub>2</sub> O                                                    | 0.03    | 0.03     | 0.04      | 0.03     |
| ZnSO <sub>4</sub> ·7H <sub>2</sub> O                                                    | 0.18    | 0.18     | 0.21      | 0.18     |
| MnSO <sub>4</sub> ·H <sub>2</sub> O                                                     | 0.20    | 0.20     | 0.24      | 0.20     |
| (NH <sub>4</sub> ) <sub>6</sub> Mo <sub>7</sub> O <sub>24</sub> ·4H <sub>2</sub> O      | 0.15    | 0.15     | 0.18      | 0.21     |
| <b>Stock solution NaCl</b>                                                              |         |          |           |          |
| Chemical formula                                                                        |         |          |           |          |
| NaCl <sup>a</sup>                                                                       | 238.80  | 238.80   | 238.80    | 238.80   |

<sup>a</sup> For preparation of a 100-fold stock solution for 34 mM NaCl. In order to achieve 17 mM NaCl half of this stock solution was added. All numbers are given in g.
