# Supplementary material
Source: MDPI journal article supplement (https://www.mdpi.com/2311-7524/8/1/59)
Supplement: s1 [file s1 › Supplementary Table S5.xlsx]

## Sheet: Amino acids
Supplementary Table S5: Contents of amino acids in fruits.
Salinity	Substrate	Asp			Glu			Asn			His			Ser			Gln			Arg			Gly			Thr			Pro			Ala			GABA			Val			Met			Ile			Leu
		Average		SD	Average		SD	Average		SD	Average		SD	Average		SD	Average		SD	Average		SD	Average		SD	Average		SD	Average		SD	Average		SD	Average		SD	Average		SD	Average		SD	Average		SD	Average		SD
		mg kg-1 FW		mg kg-1 FW	mg kg-1 FW		mg kg-1 FW	mg kg-1 FW		mg kg-1 FW	mg kg-1 FW		mg kg-1 FW	mg kg-1 FW		mg kg-1 FW	mg kg-1 FW		mg kg-1 FW	mg kg-1 FW		mg kg-1 FW	mg kg-1 FW		mg kg-1 FW	mg kg-1 FW		mg kg-1 FW	mg kg-1 FW		mg kg-1 FW	mg kg-1 FW		mg kg-1 FW	mg kg-1 FW		mg kg-1 FW	mg kg-1 FW		mg kg-1 FW	mg kg-1 FW		mg kg-1 FW	mg kg-1 FW		mg kg-1 FW	mg kg-1 FW		mg kg-1 FW
Control	Coco peat	828.49	±	109.234	3992.75	±	477.521	192.394	±	27.7189	43.7258	±	4.70797	53.798	±	12.1517	1310.36	±	368.348	73.3815	±	9.25202	8.71485	±	2.89091	42.2998	±	6.03688	71.2424	±	35.4063	57.3412	±	22.4849	375.427	±	136.126	12.1633	±	3.57553	14.1296	±	2.0457	23.9579	±	7.02804	33.2412	±	8.29166
Control	Perlite	813.092	±	137.097	3966.9	±	517.526	175.125	±	23.6266	40.698	±	7.34937	50.5893	±	7.67253	1267.85	±	349.649	67.6416	±	27.6091	7.63691	±	1.99166	38.2736	±	4.01716	48.7993	±	16.0309	46.3452	±	6.6499	364.139	±	143.501	11.4155	±	3.12495	14.6104	±	3.03929	21.583	±	3.91017	32.1443	±	6.84093
Control	Rockwool	872.14	±	80.2511	4119.24	±	519.695	186.292	±	13.6643	30.3524	±	6.80251	52.1562	±	7.07525	1312.85	±	322.172	75.0451	±	7.00497	7.95869	±	1.97192	40.8213	±	2.66885	63.964	±	7.99722	52.2115	±	16.654	345.876	±	101.61	12.1419	±	3.84712	15.3767	±	2.55433	22.1561	±	3.32982	32.9497	±	5.39152
17 mM	Coco peat	767.453	±	128.936	4163.84	±	824.03	164.762	±	28.7346	42.6833	±	9.64566	58.8132	±	13.6416	1066.98	±	371.811	56.3545	±	32.6422	8.60851	±	1.68188	39.8019	±	8.41358	115.971	±	34.1002	63.1765	±	25.9112	312.388	±	86.6358	13.0432	±	2.84148	14.8354	±	2.33939	23.5024	±	5.6156	33.1329	±	5.67619
17 mM	Perlite	777.936	±	78.5759	3833.66	±	388.992	168.399	±	23.189	36.4378	±	12.2031	55.9453	±	6.59645	1122.1	±	394.427	68.4698	±	6.70033	7.25817	±	2.16412	36.3661	±	6.28752	83.7426	±	18.8004	42.5225	±	6.29245	329.448	±	105.367	11.2478	±	3.33805	14.5264	±	2.5823	21.5511	±	3.07463	30.5825	±	5.38344
17 mM	Rockwool	709.702	±	121.587	3708.47	±	760.345	151.113	±	23.4911	30.5506	±	8.12246	49.9382	±	12.3084	1023	±	372.597	55.4477	±	20.5762	9.30952	±	6.76181	33.4079	±	10.6743	116.162	±	48.6148	50.0309	±	20.6191	266.731	±	76.5772	10.1596	±	1.62164	13.3849	±	2.49743	19.1508	±	3.25756	27.2858	±	4.58334
34 mM	Coco peat	718.725	±	115.93	4017.25	±	684.019	183.222	±	31.7591	38.5908	±	8.40059	62.2241	±	17.8303	1131.16	±	431.289	56.7121	±	21.3696	7.52795	±	1.59294	38.2252	±	7.25156	249.318	±	43.5902	55.4758	±	14.7166	295.694	±	54.4727	11.2887	±	2.79237	12.8741	±	2.83969	21.875	±	3.48705	30.0606	±	3.8115
34 mM	Perlite	707.796	±	88.8357	3720.72	±	501.017	155.374	±	24.2877	37.049	±	10.1155	58.9625	±	13.2502	1014.99	±	345.909	68.7084	±	8.3431	7.00514	±	1.6884	38.5889	±	5.08755	143.052	±	52.6514	45.3346	±	11.6386	282.013	±	81.8955	10.4492	±	3.21099	13.9966	±	4.78362	22.8115	±	3.41282	30.3306	±	4.46465
34 mM	Rockwool	766.494	±	73.6799	3893.3	±	533.229	167.035	±	18.0074	40.2256	±	4.51458	60.304	±	11.5264	1060.27	±	361.303	60.1688	±	9.24881	8.38074	±	2.51435	42.6604	±	4.74102	236.115	±	52.7748	65.8732	±	14.0158	279.975	±	60.6336	10.3454	±	3.27035	13.0063	±	1.94462	25.3516	±	4.29097	31.0873	±	2.38087
[truncated: 15 more columns]
